# Supplementary material for: Mitochondrial-Targeted Therapies Require Mitophagy to Prevent Oxidative Stress Induced by SOD2 Inactivation in Hypertrophied Cardiomyocytes
Source: MDPI journal article supplement (doi:10.3390/antiox11040723), 2022-04-06

**Description:** Here, we provided all the uncropped gels corresponding to the western blot showed in the manuscript.

**Figure 1D**

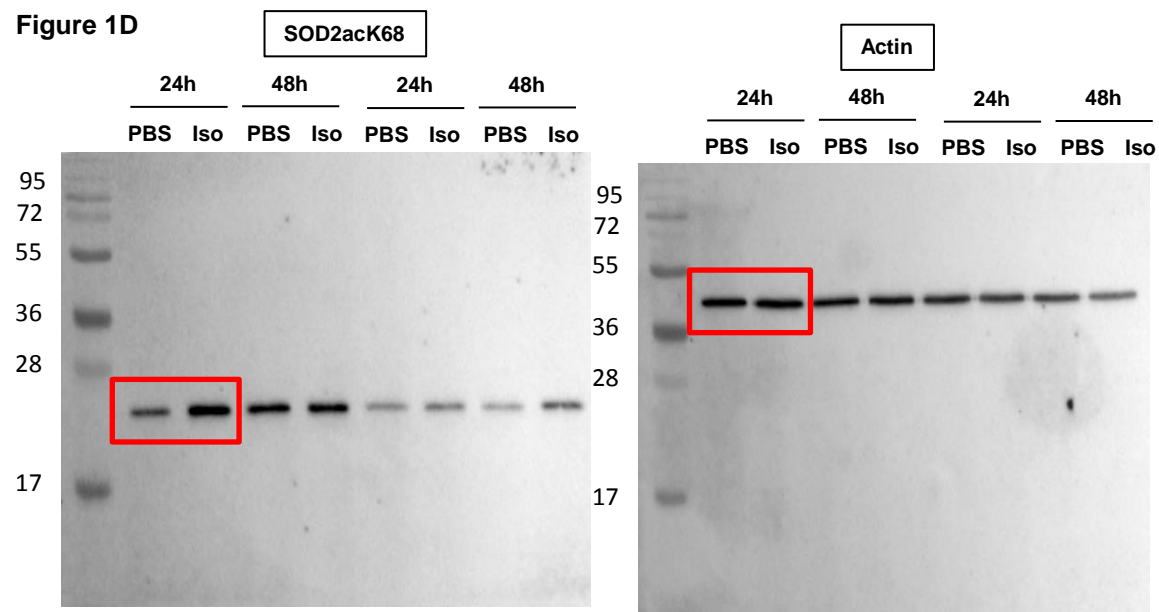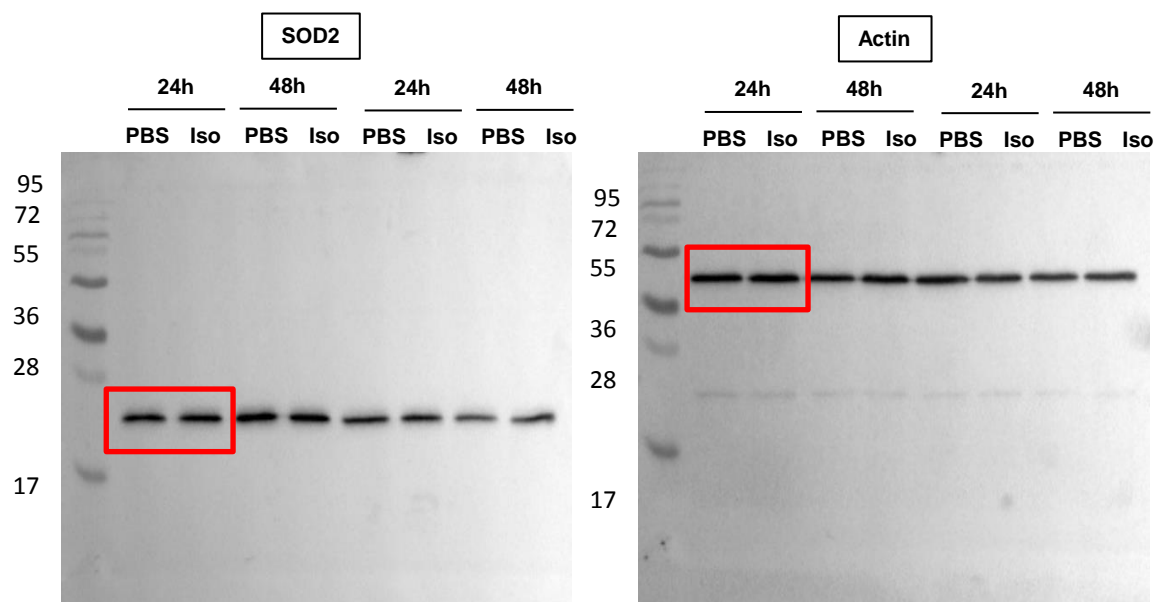

**Figure 1D**

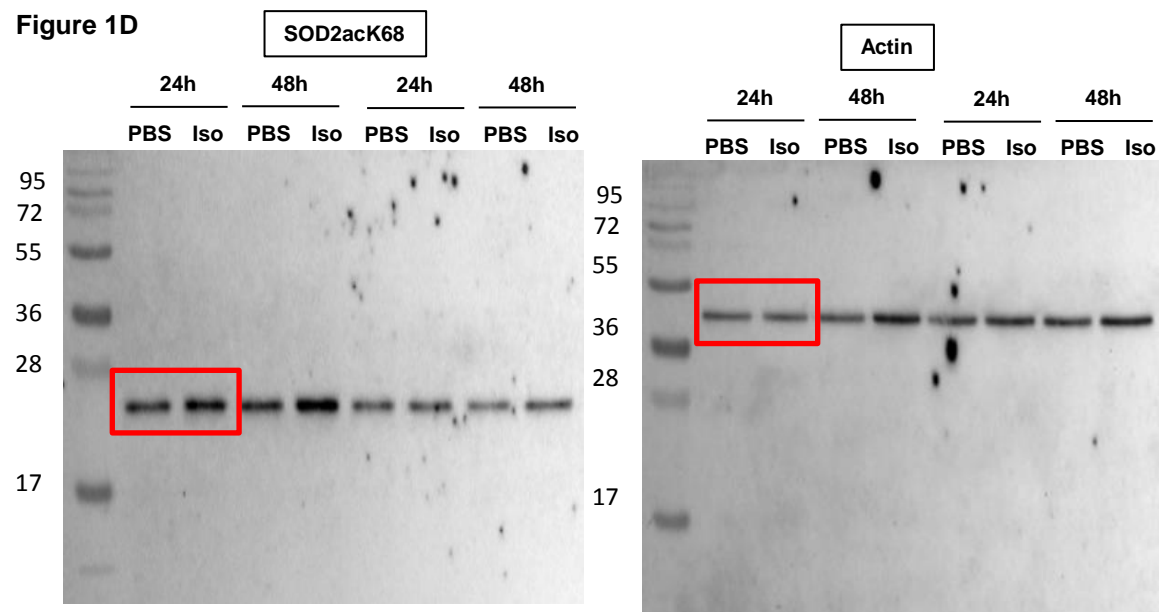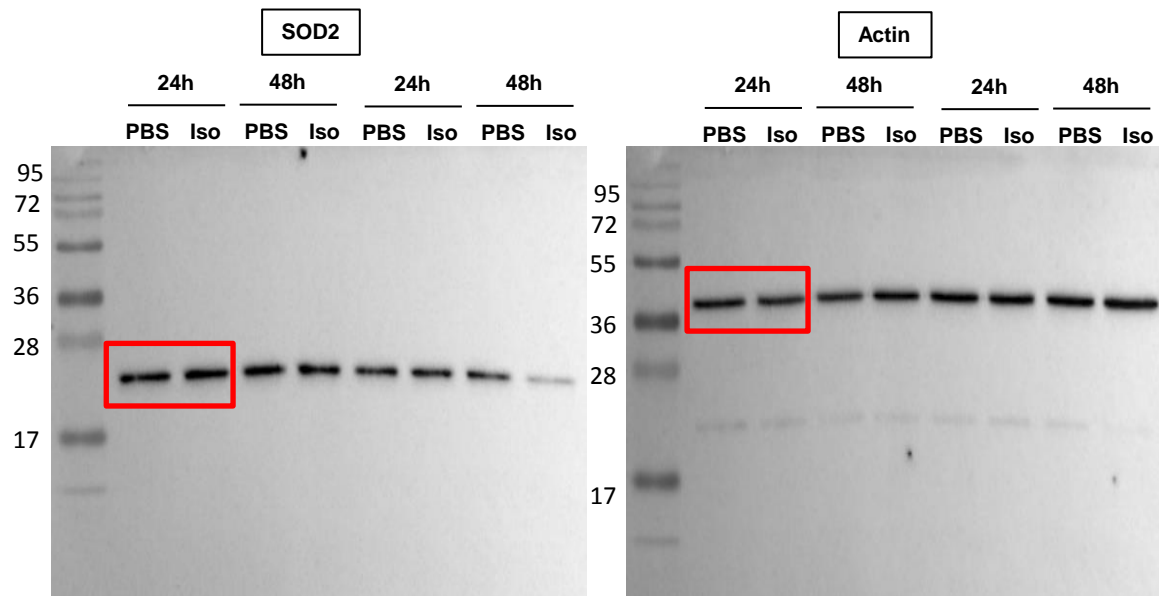

Figure 1E

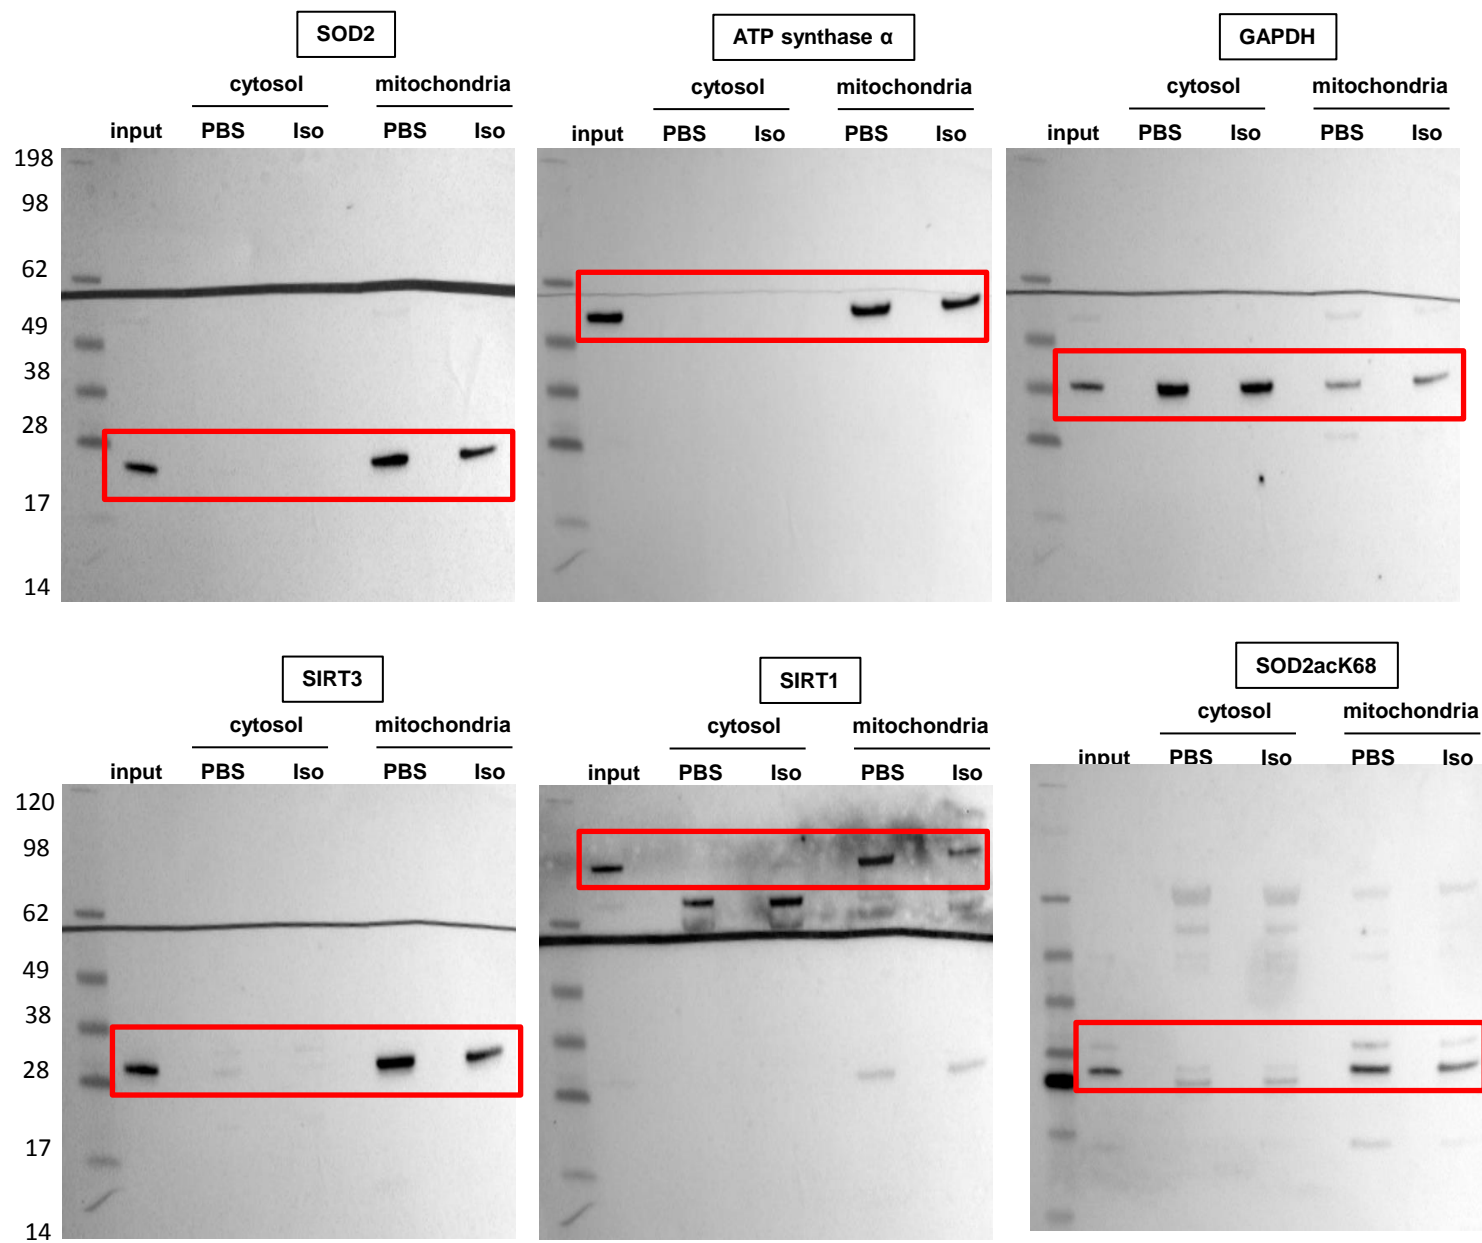

**Figure S1C**

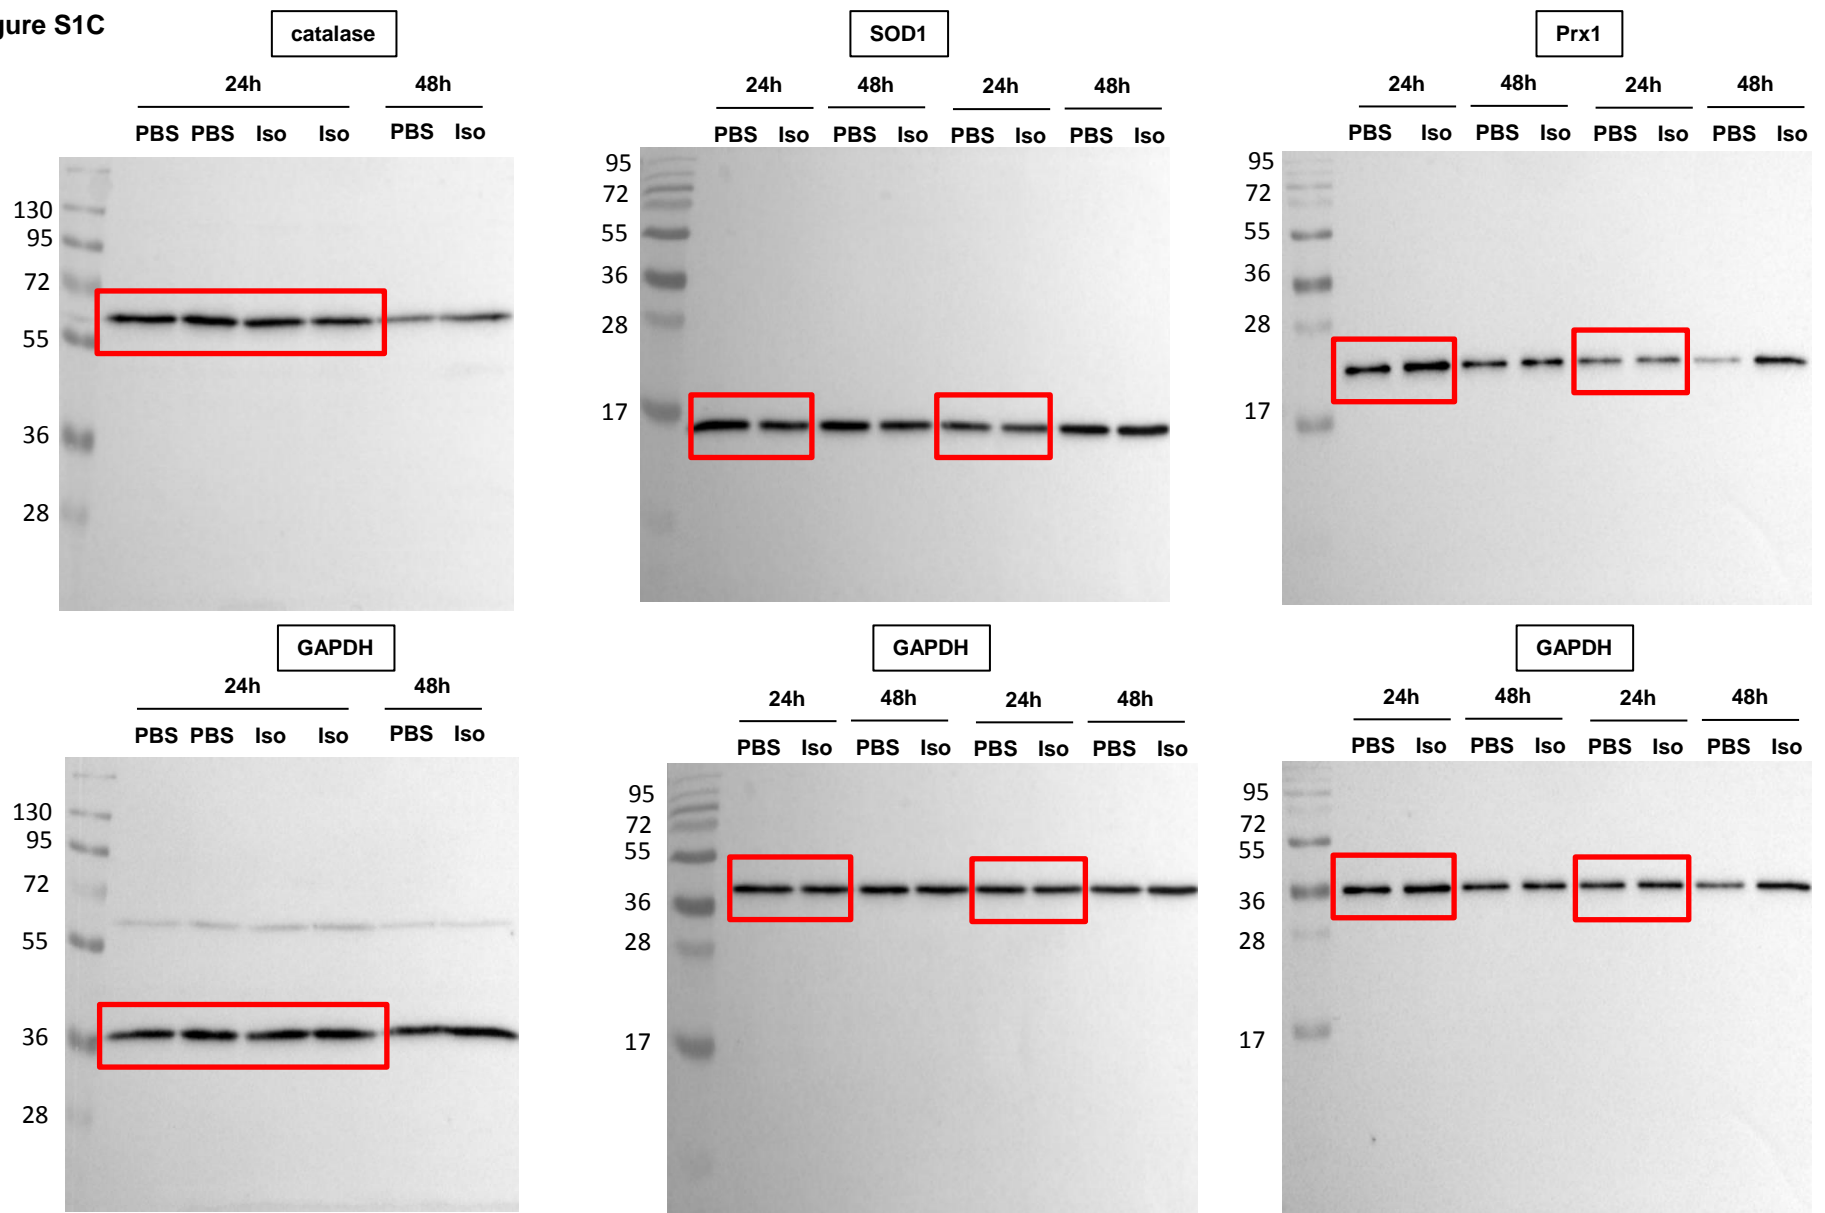

Figure S1C

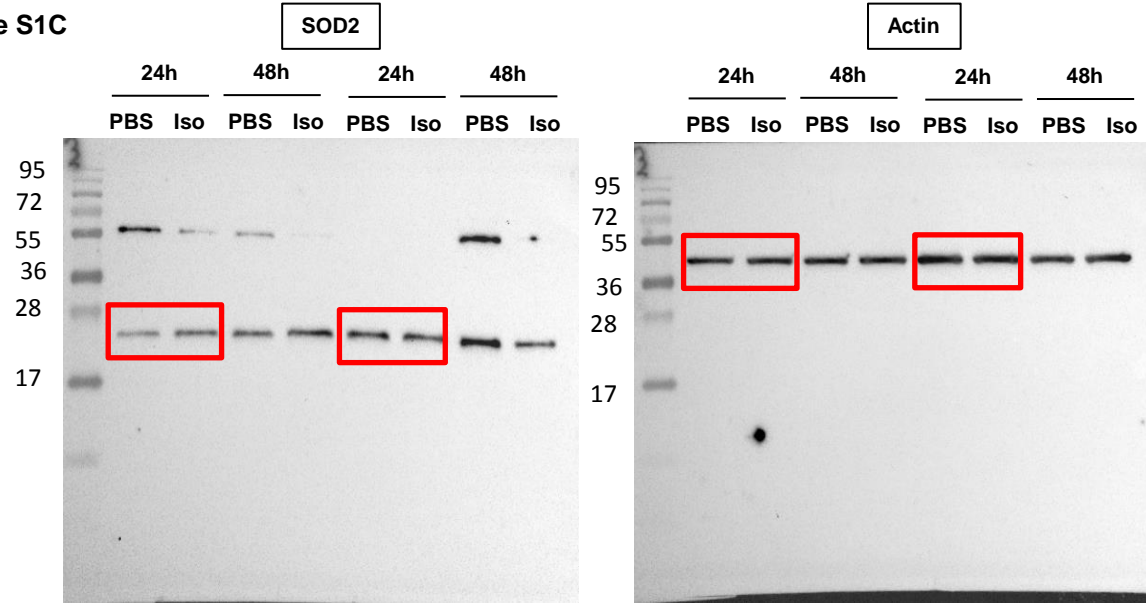

**Figure S1D**

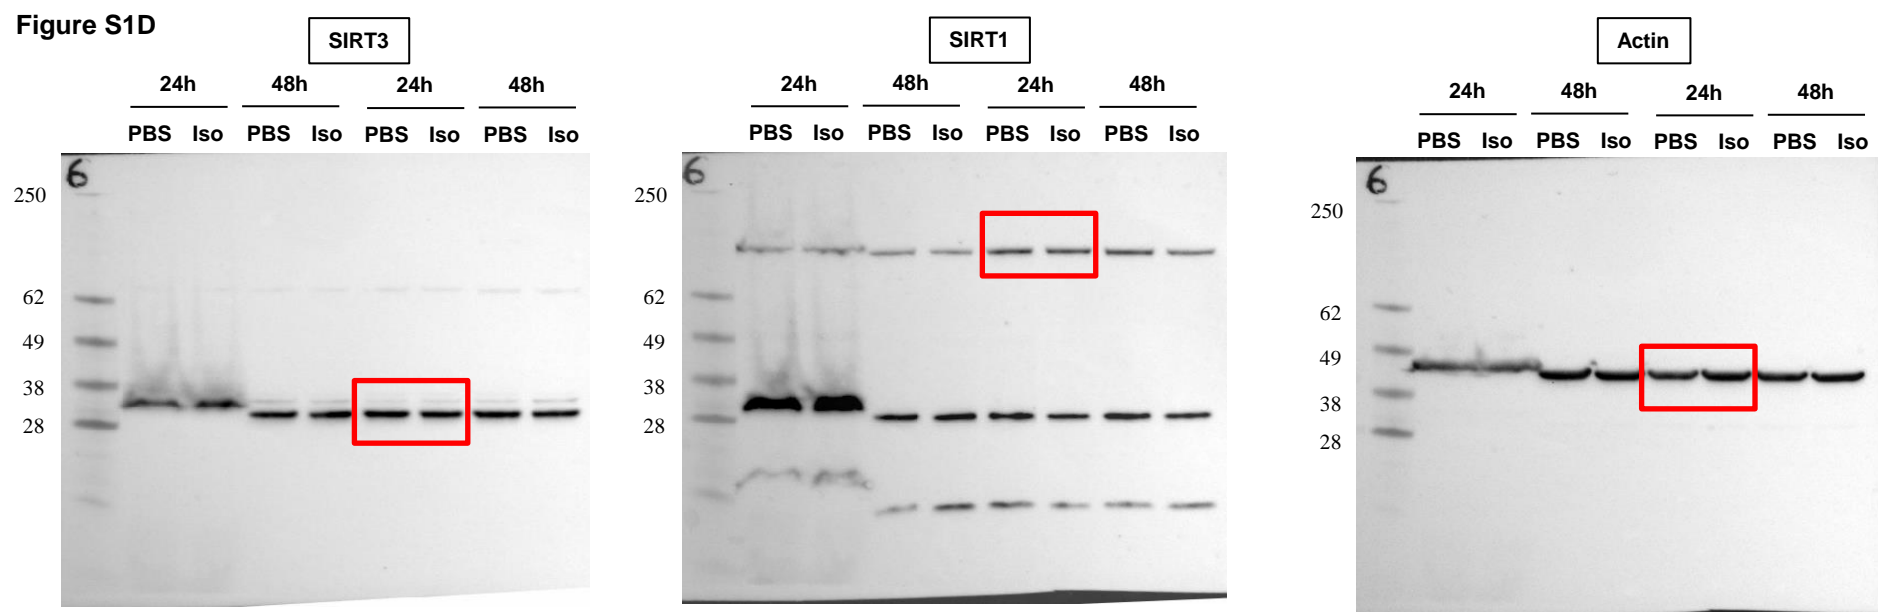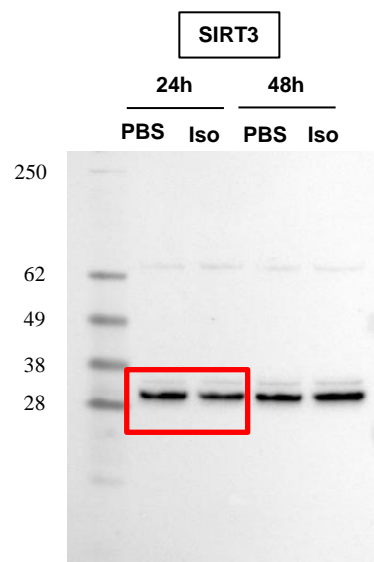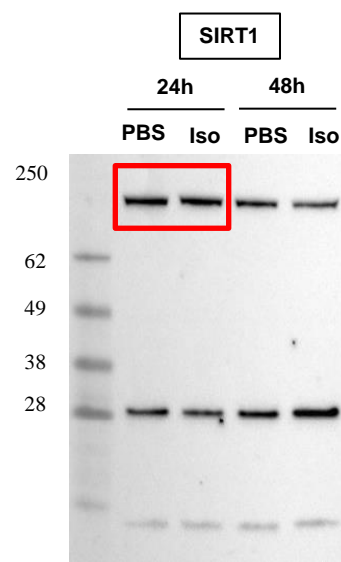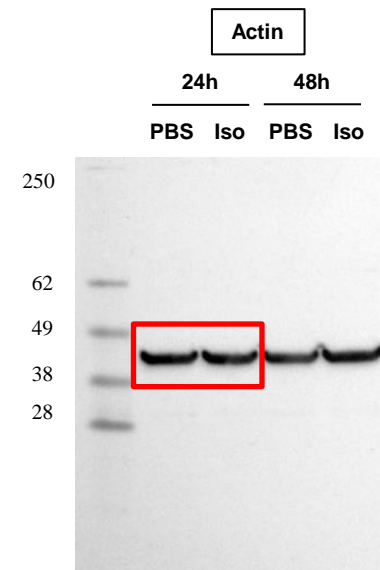

Figure S1D

SIRT6

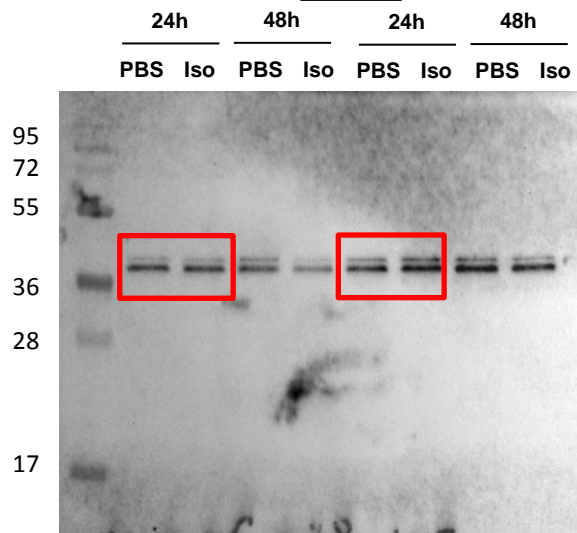

Actin

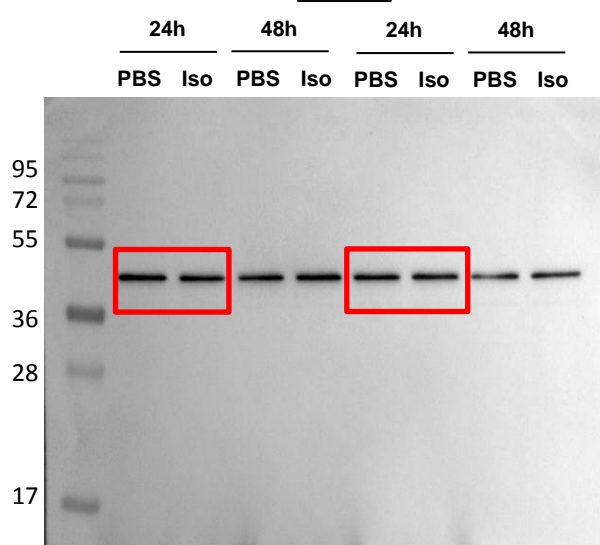



**Figure S1E**

**SOD2acK68**

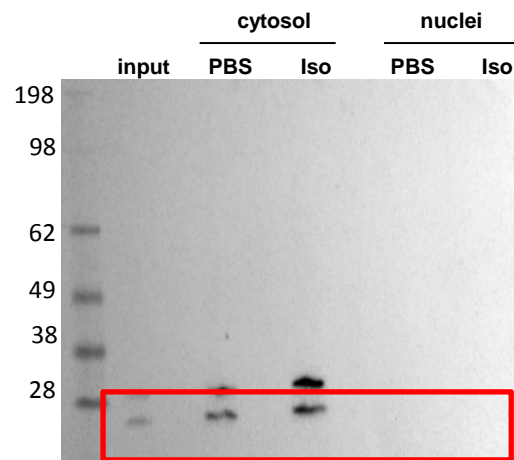

**Lamin B1**

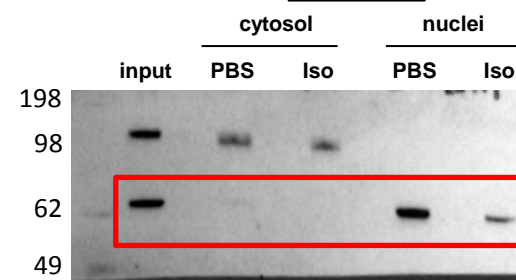

**GAPDH**

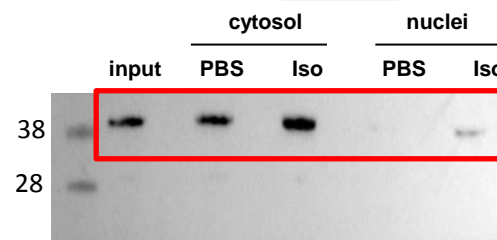

**SIRT1**

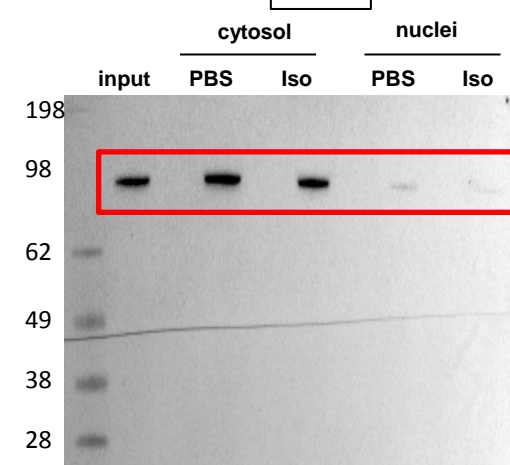

**SOD2**

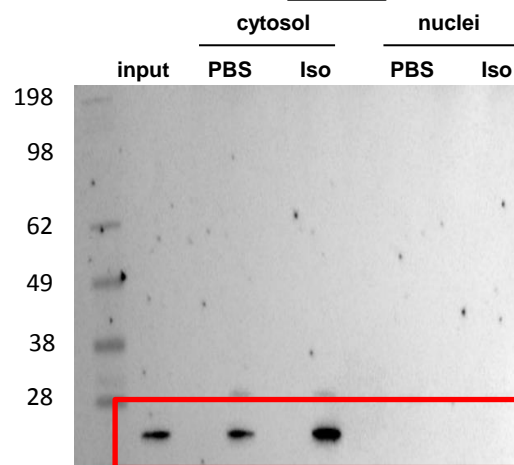

**SIRT6**

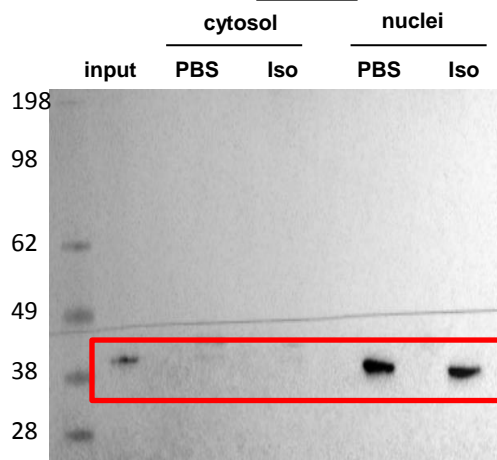

**SIRT3**

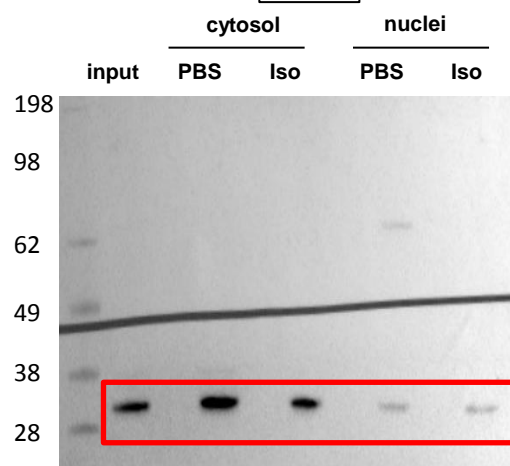

Figure 2A

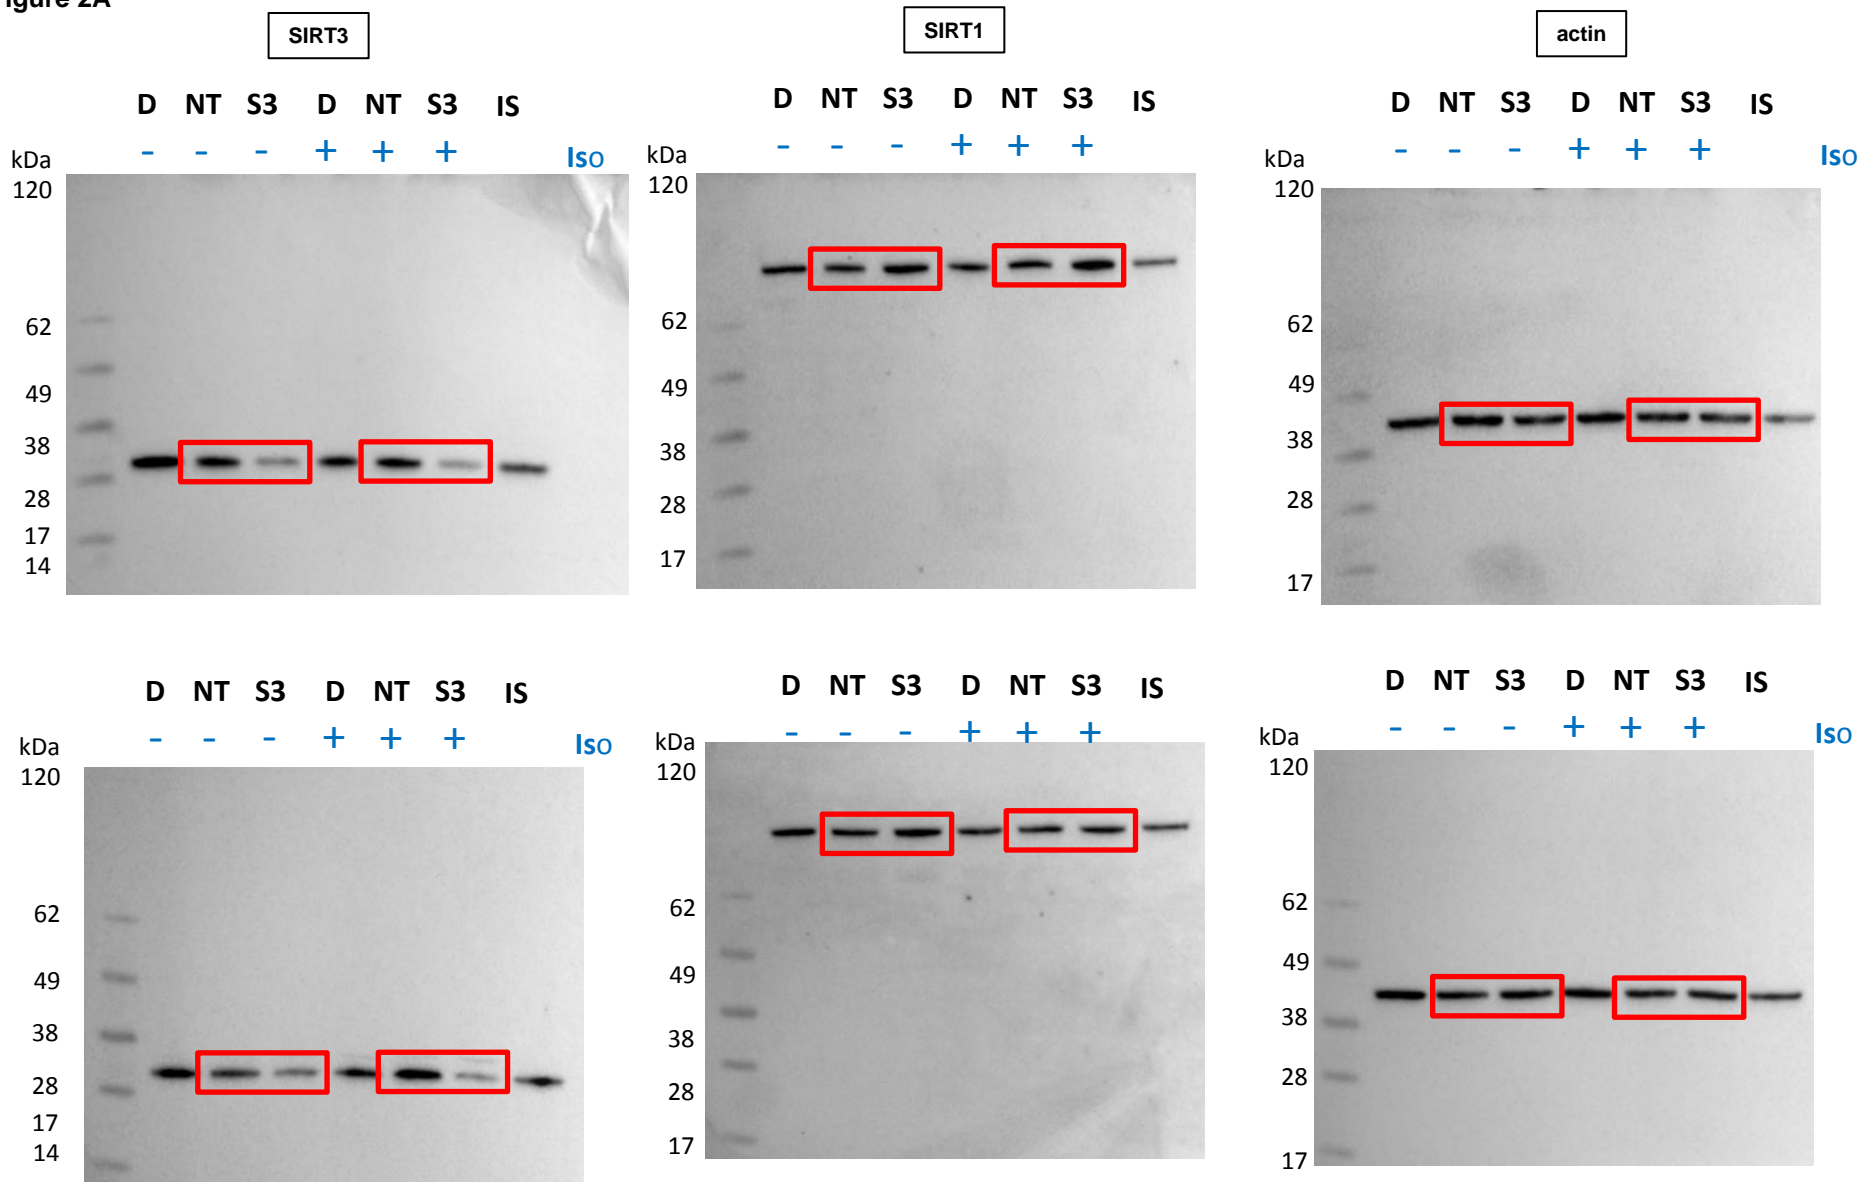

**Figure 2B**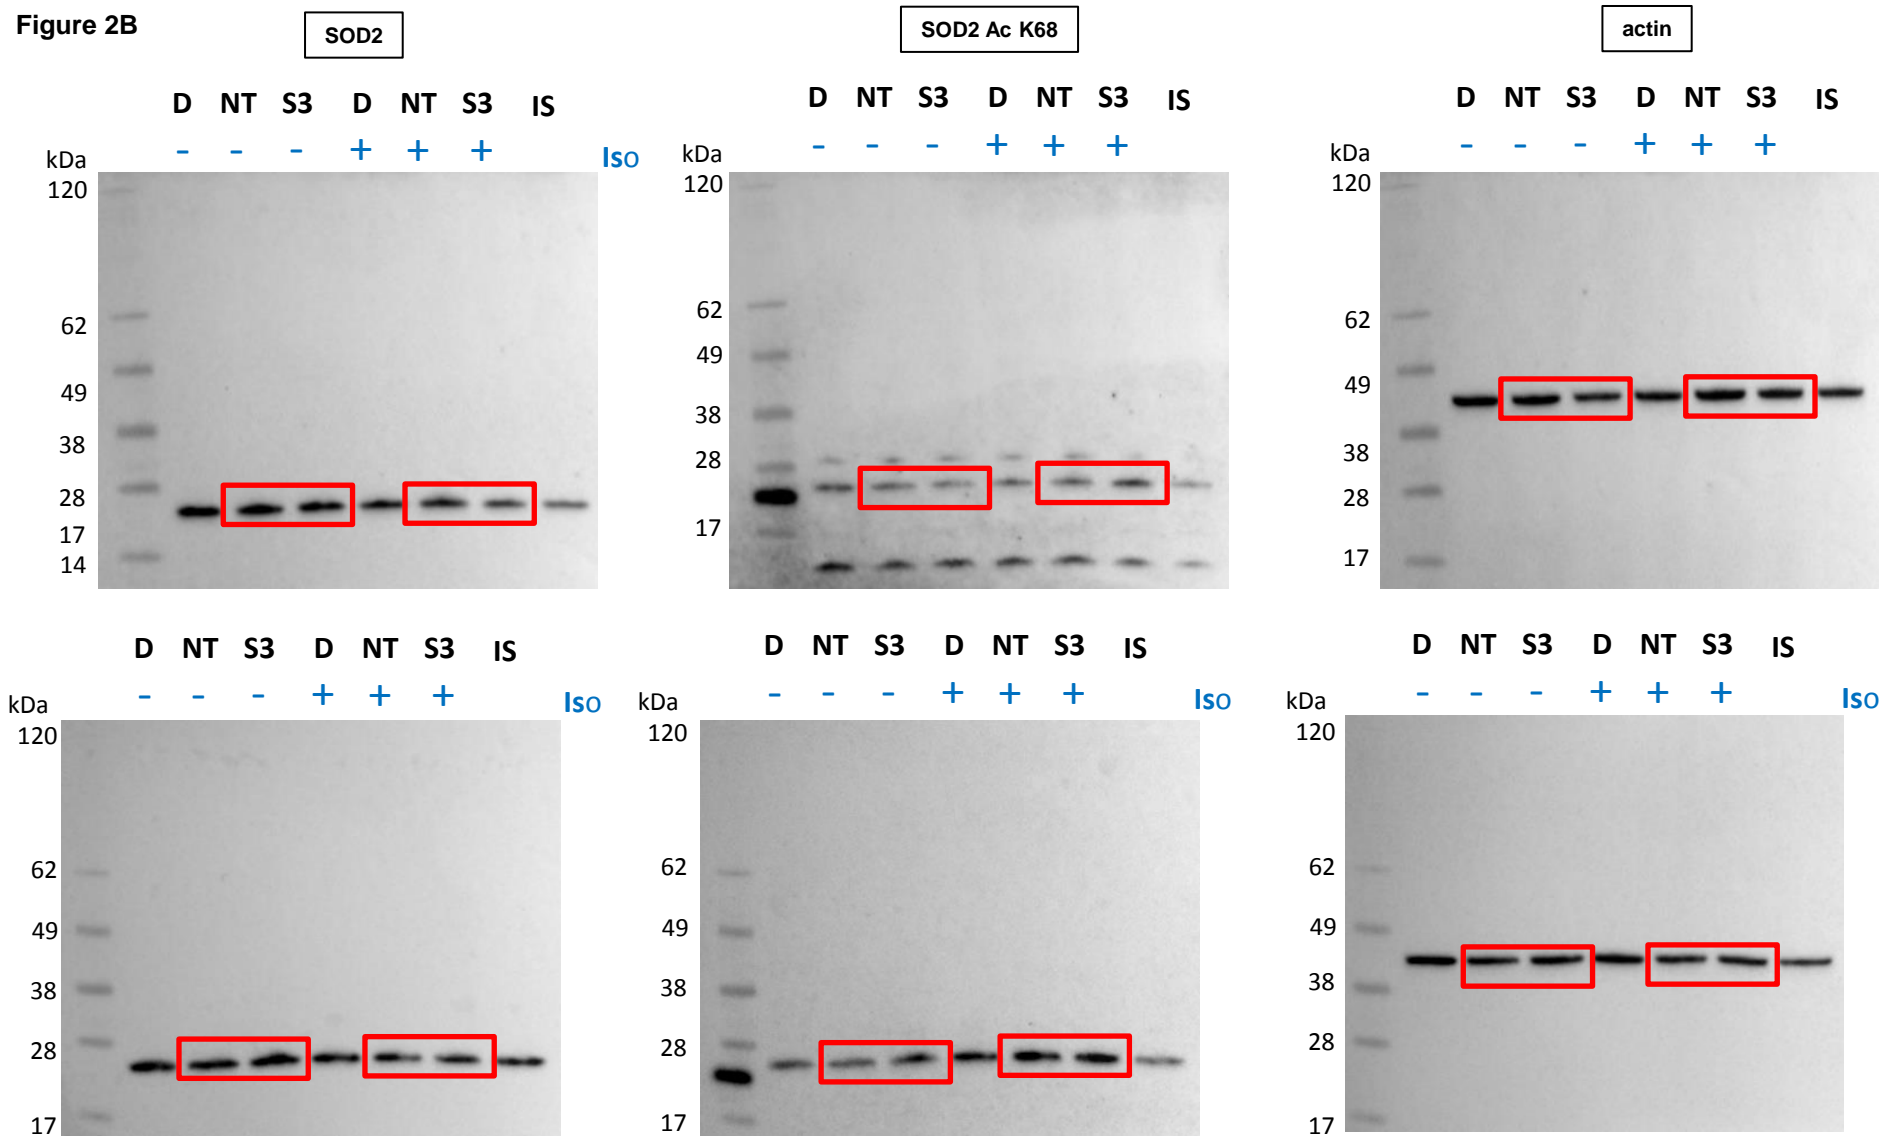

Figure 3A

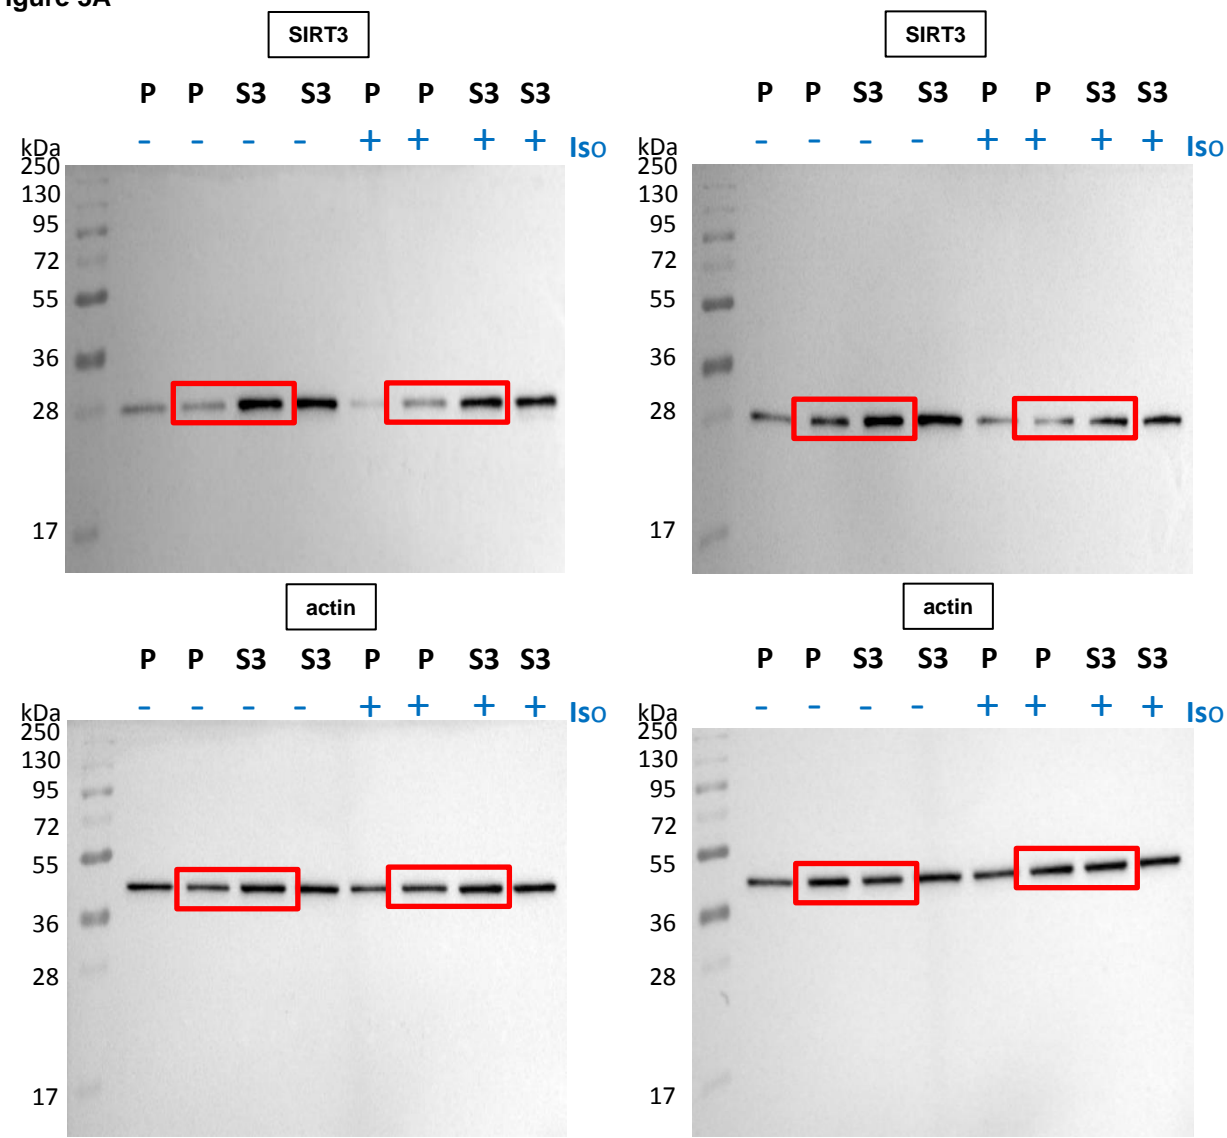

Figure 3A

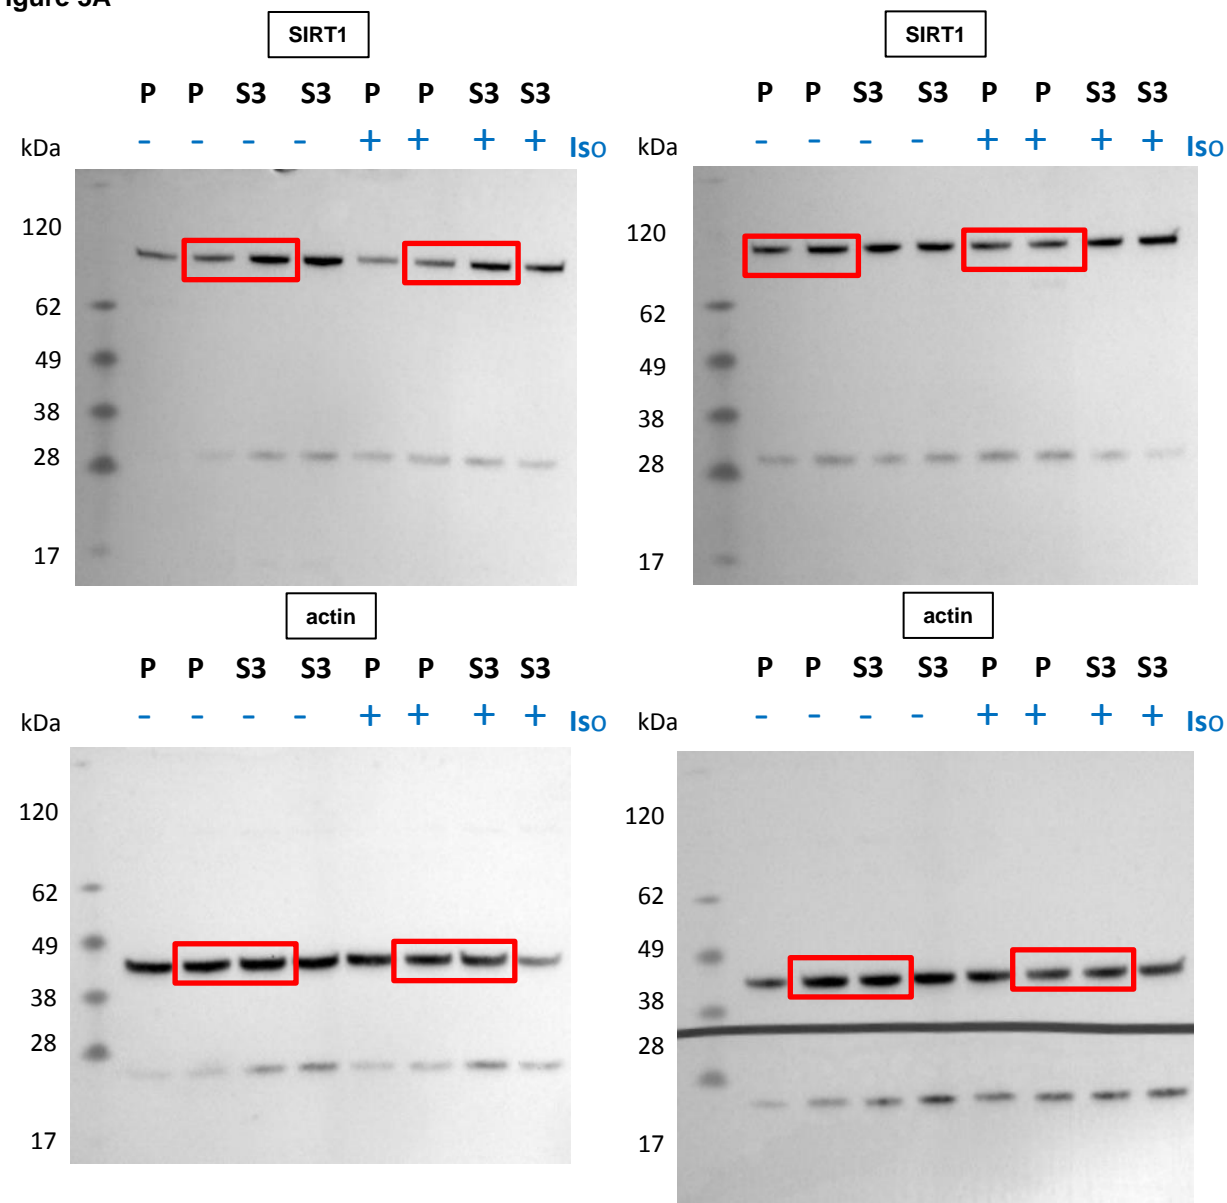

Figure 3B

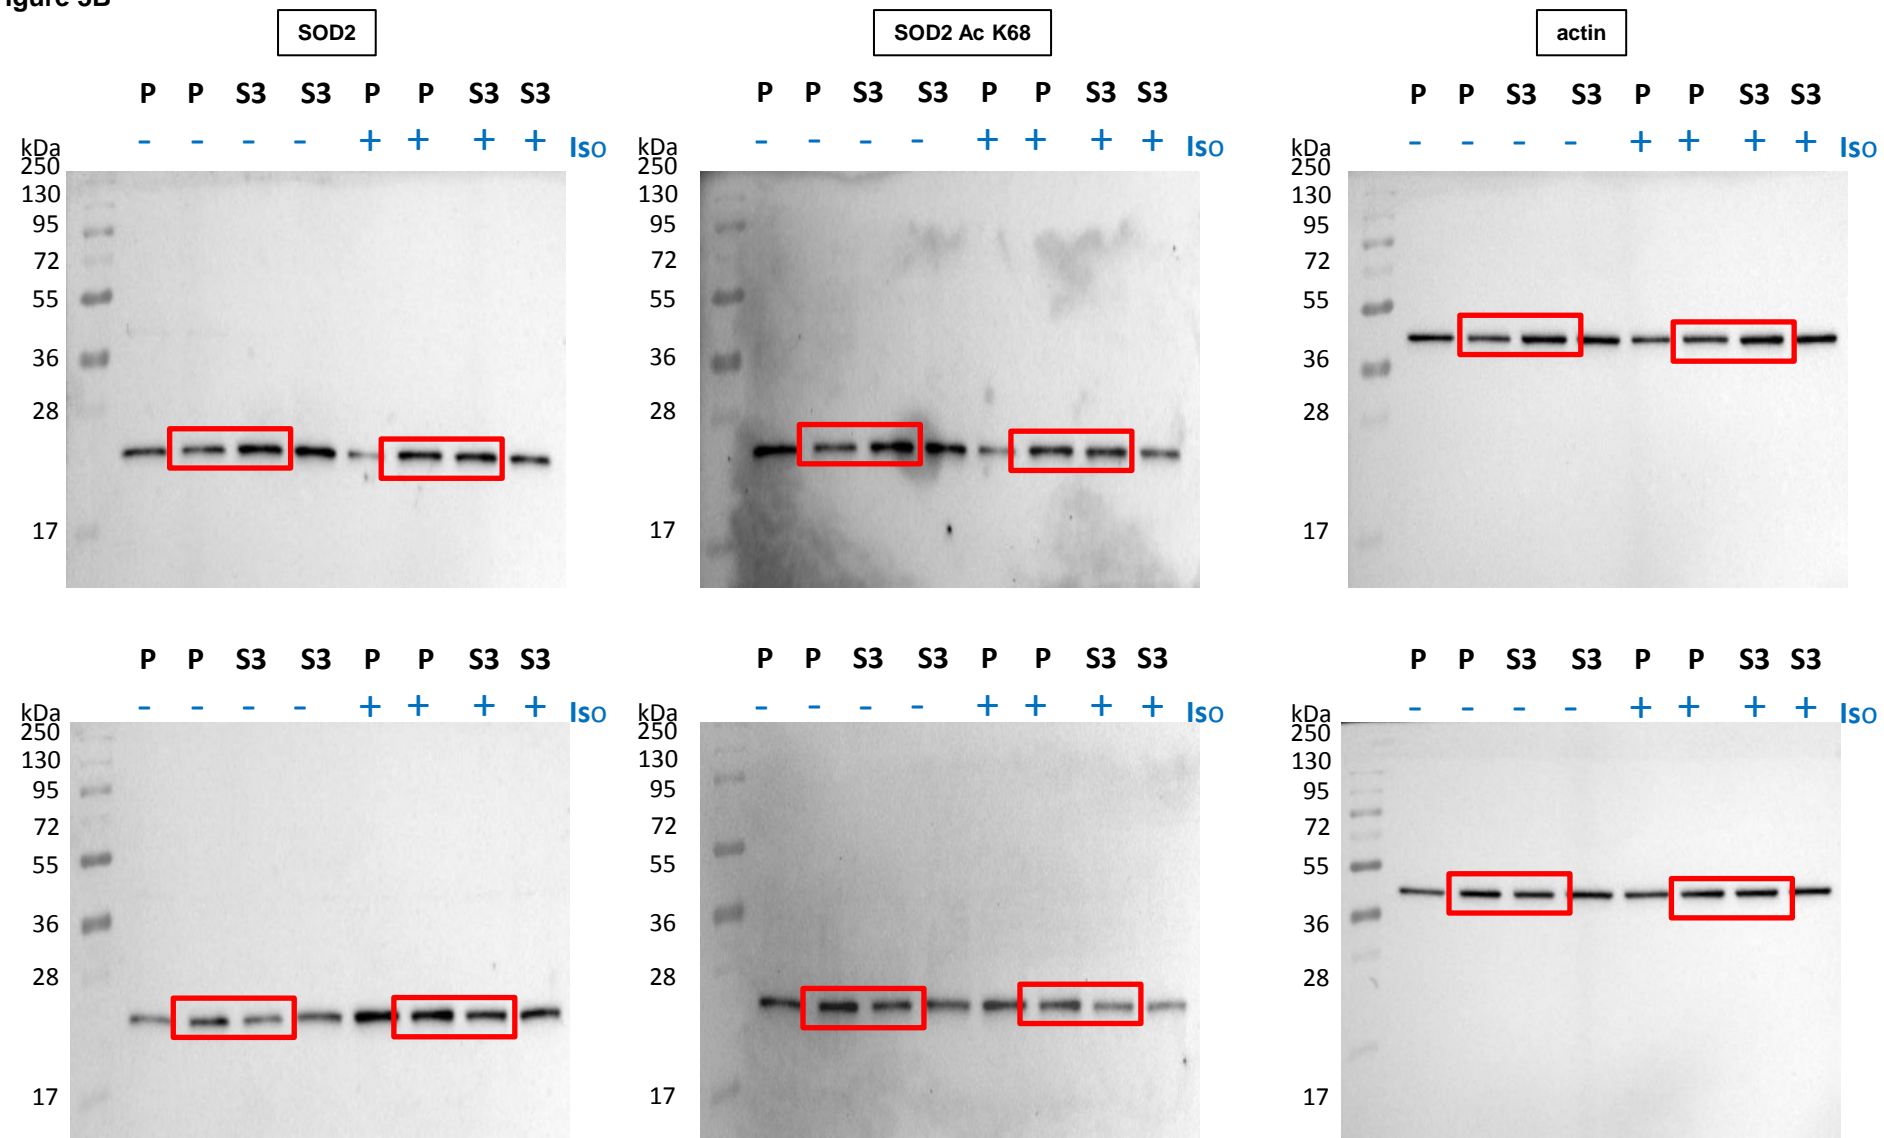

Figure S2A

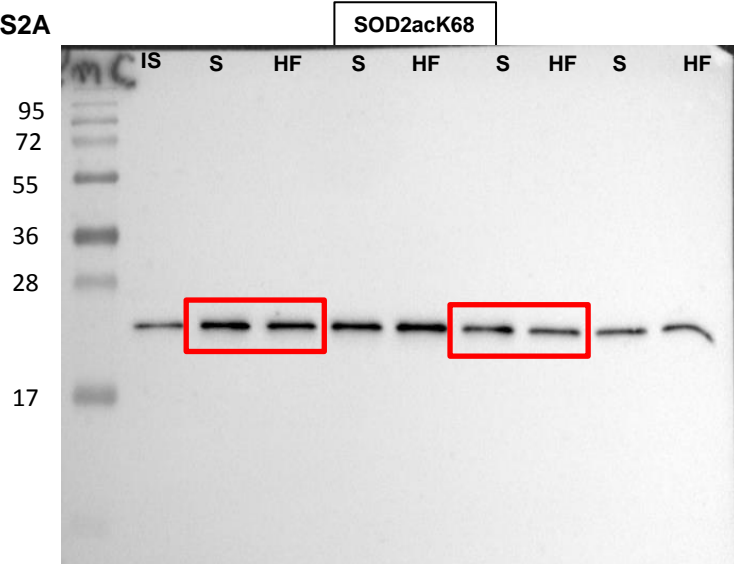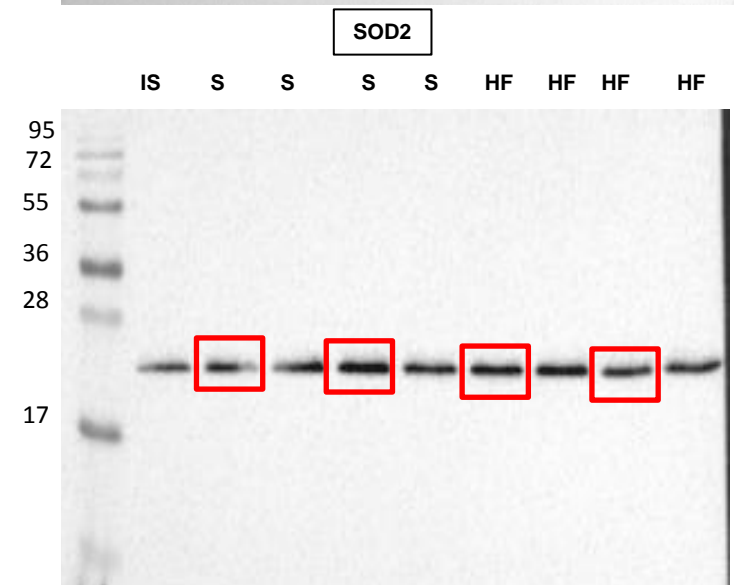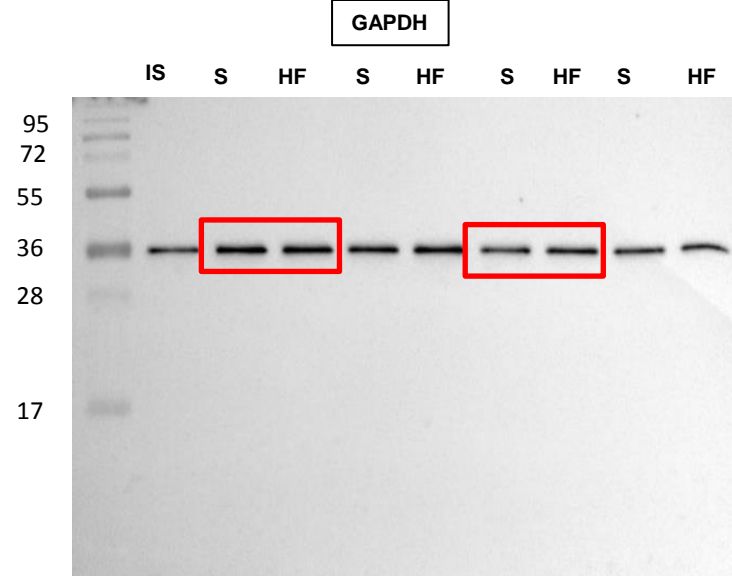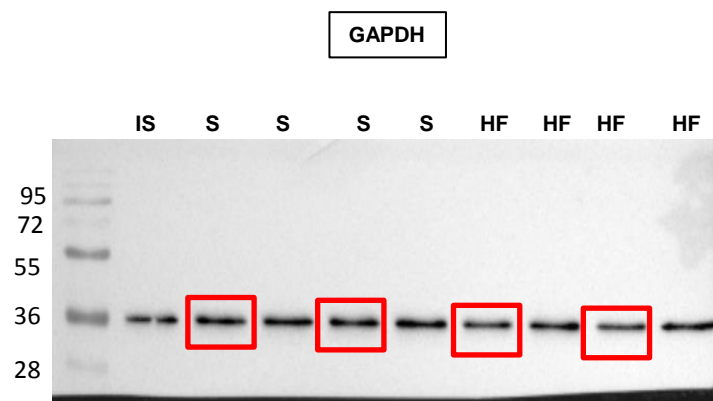

Figure S2A

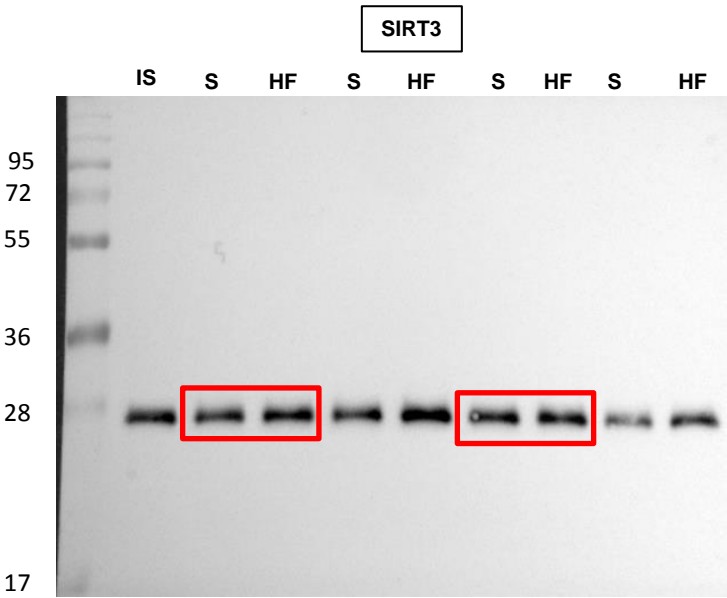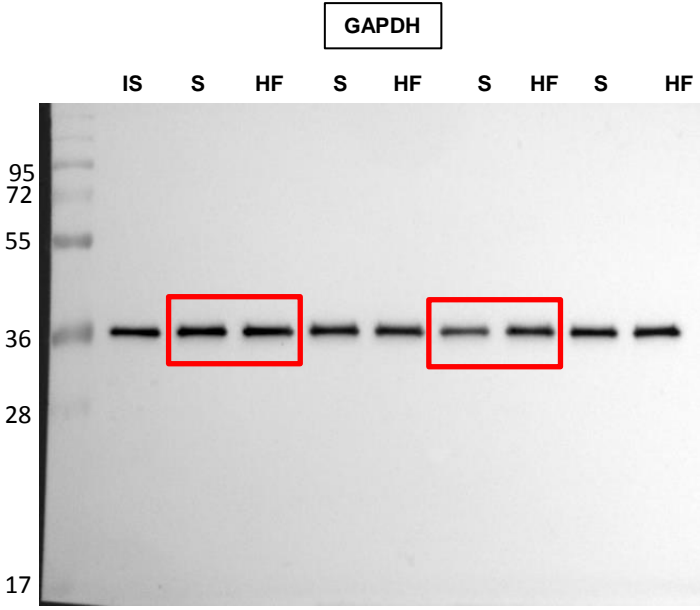



Figure S2B

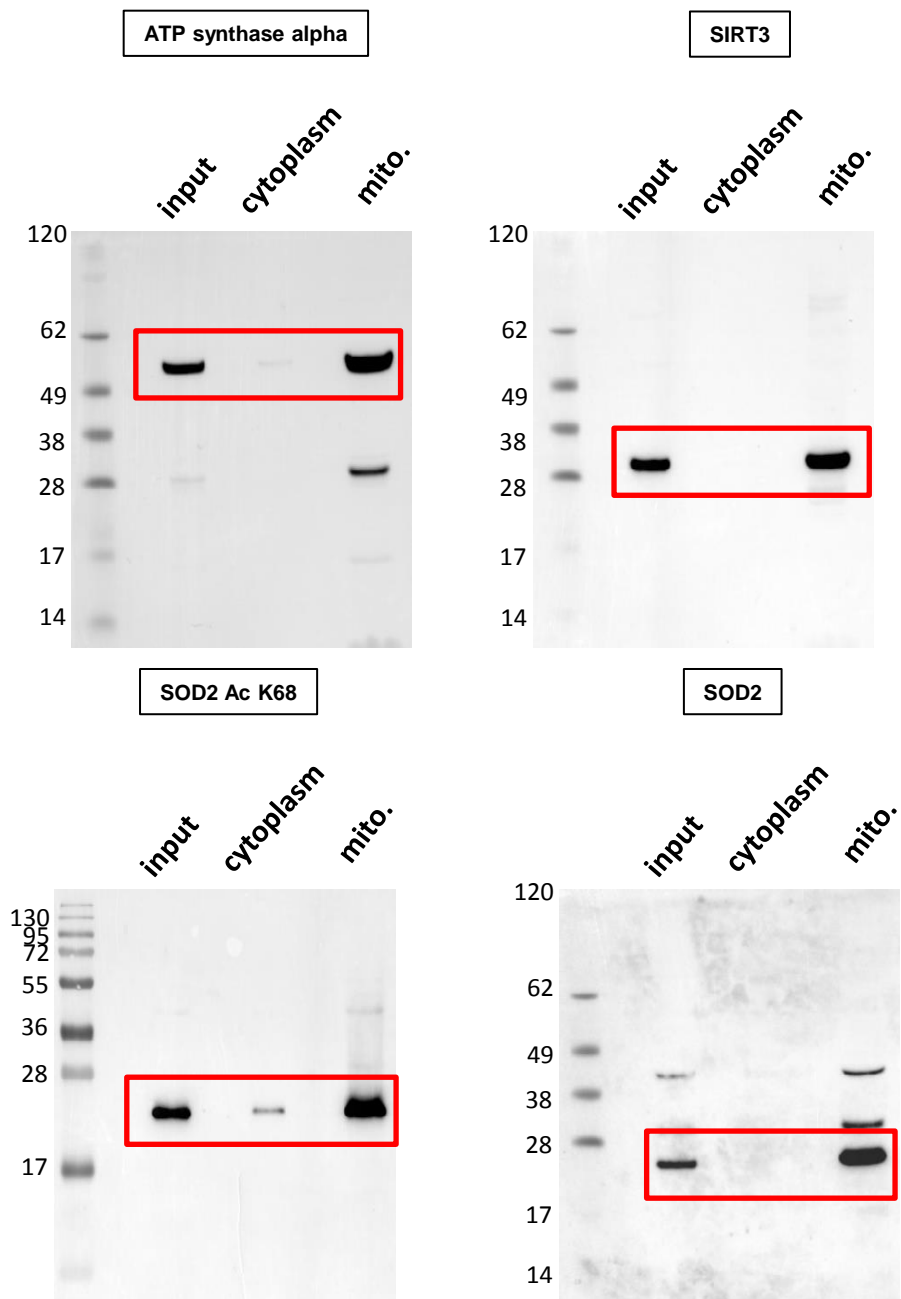

Figure S2C

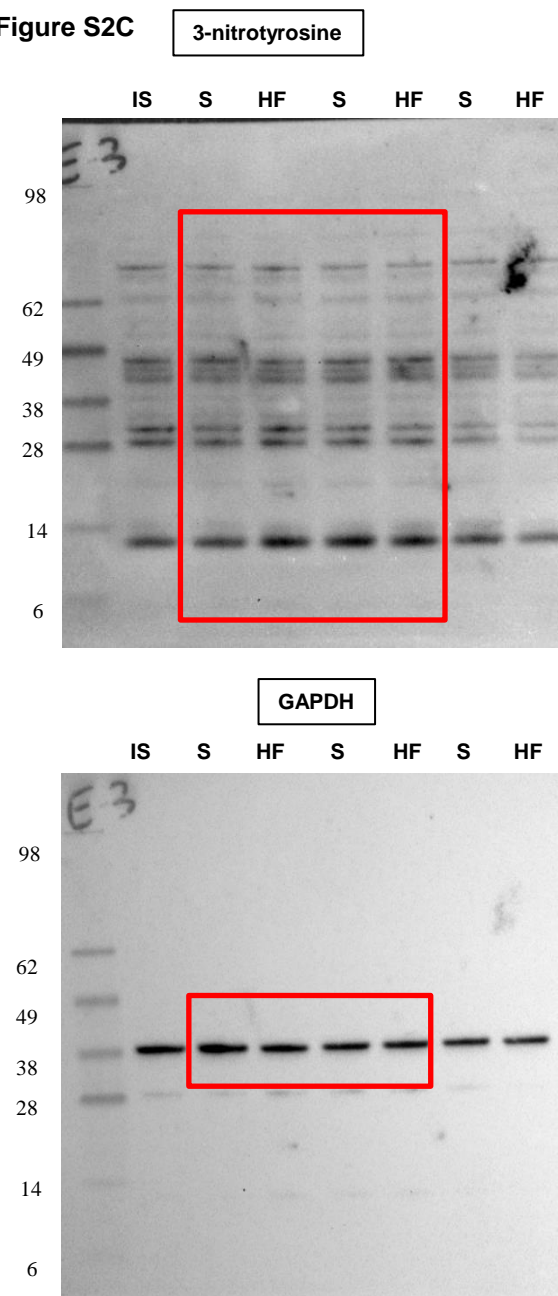

Figure S2D

SIRT3

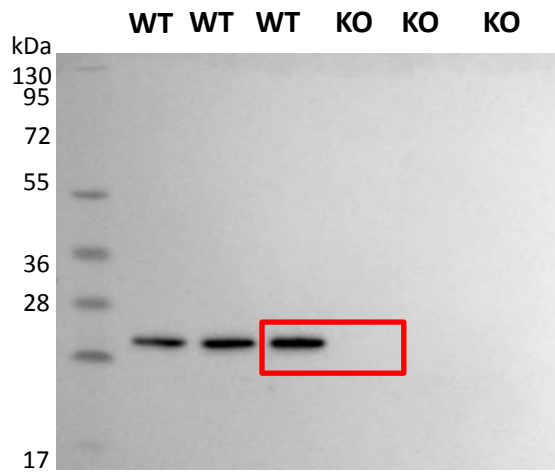

GAPDH

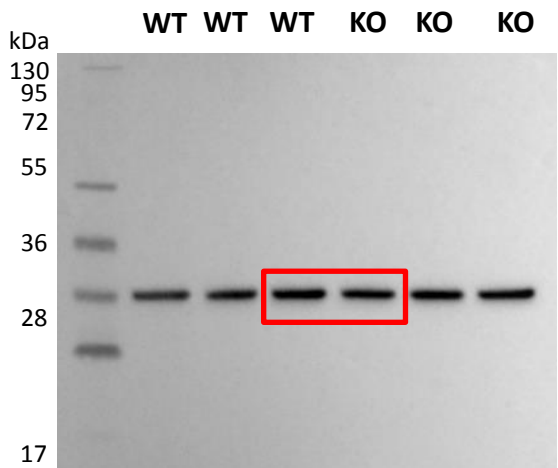

SIRT3

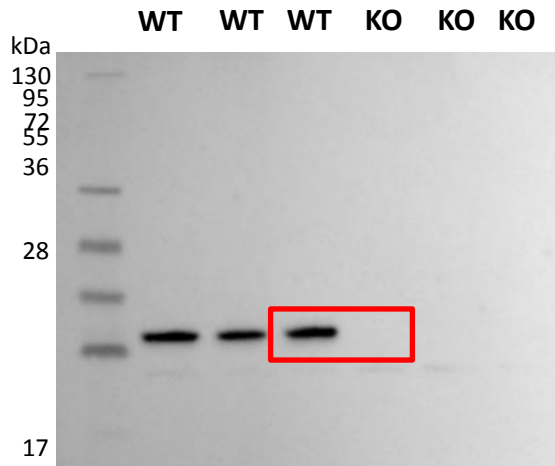

GAPDH

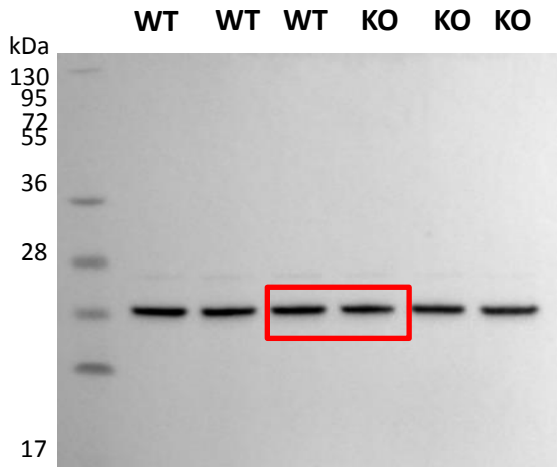

Figure S2D

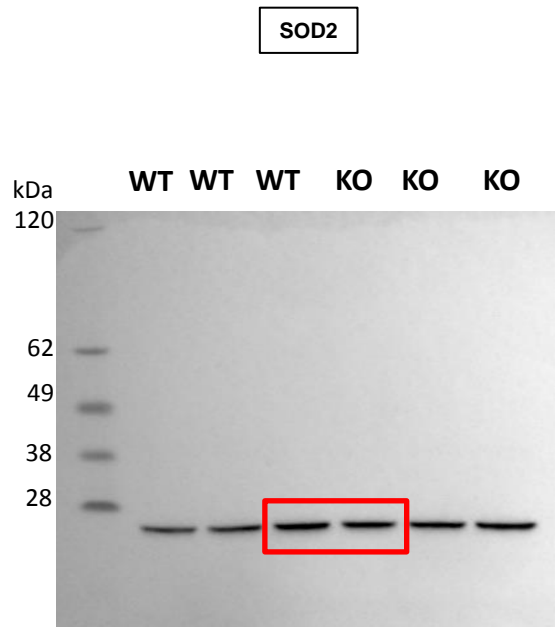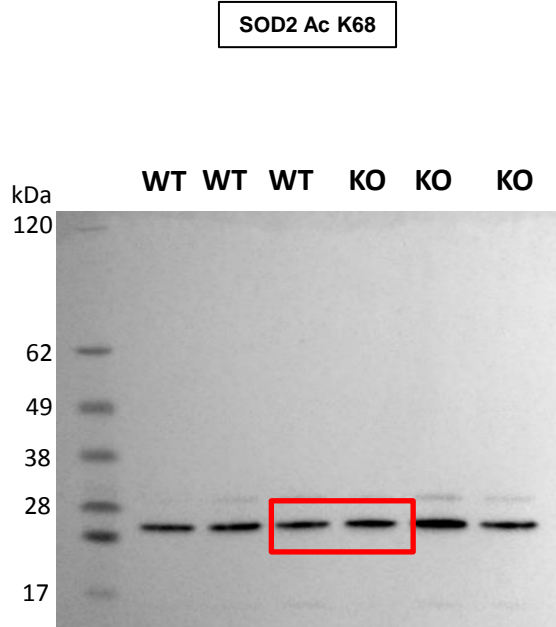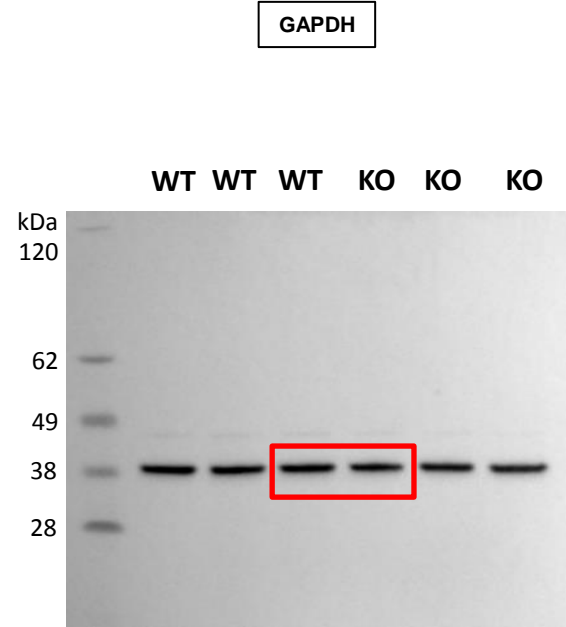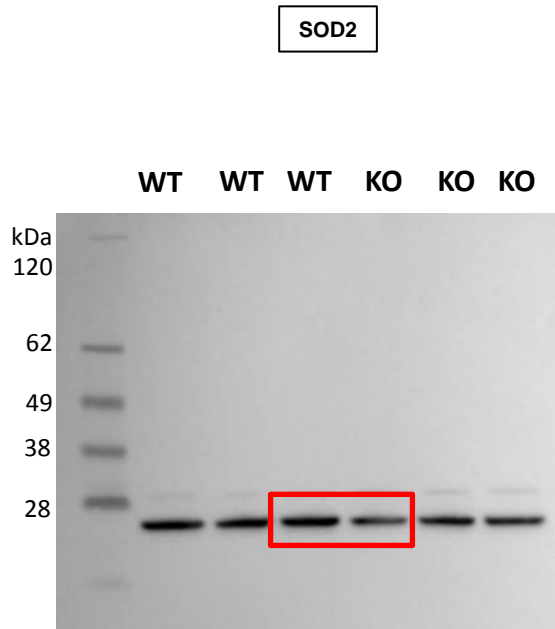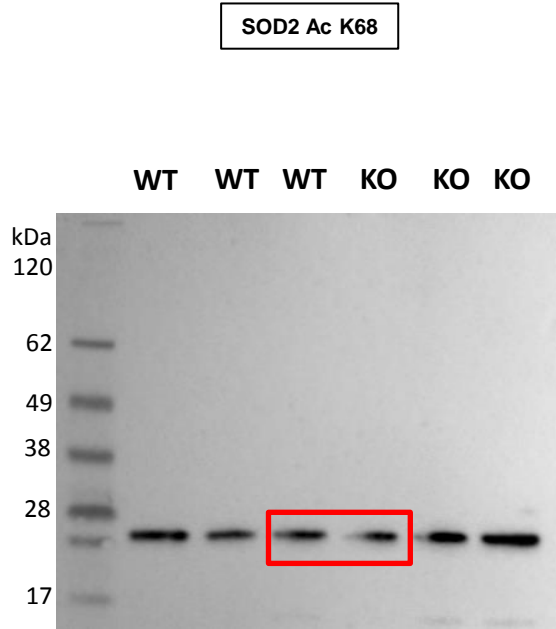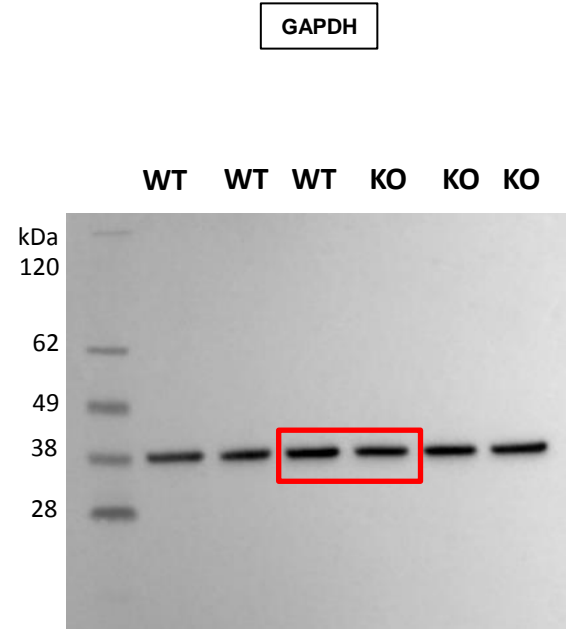

Figure 4c

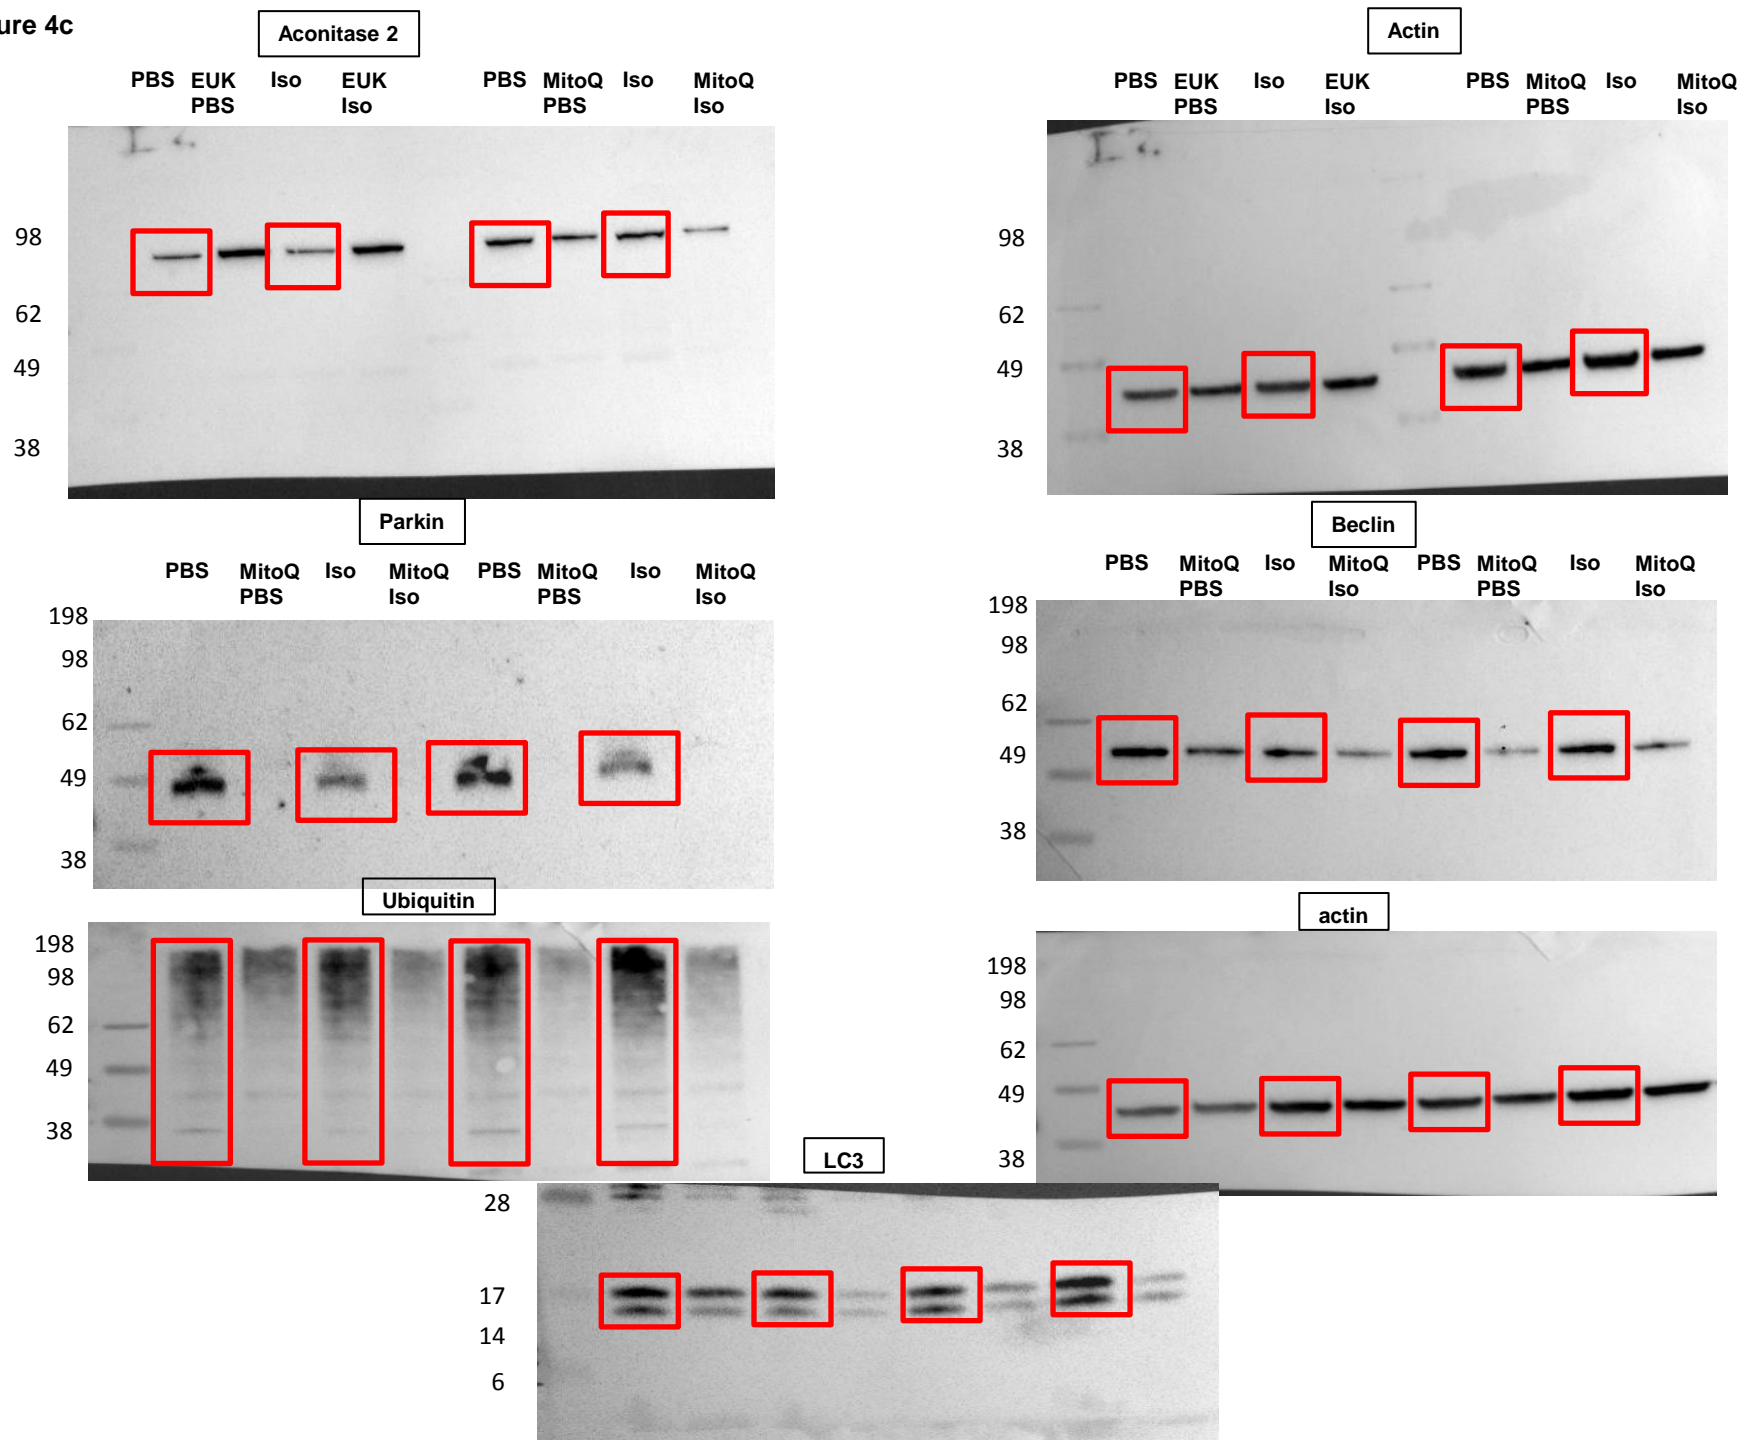

Figure S3B

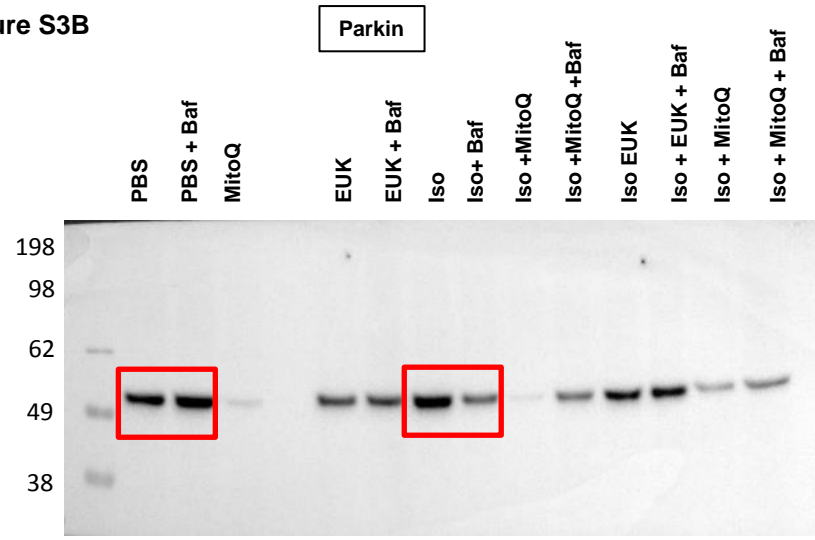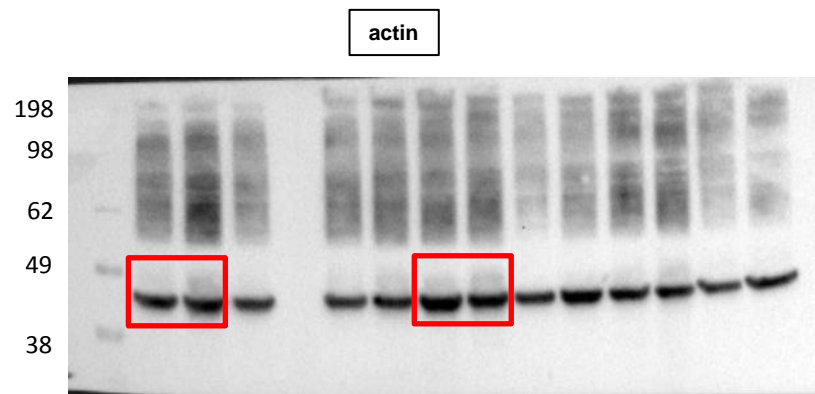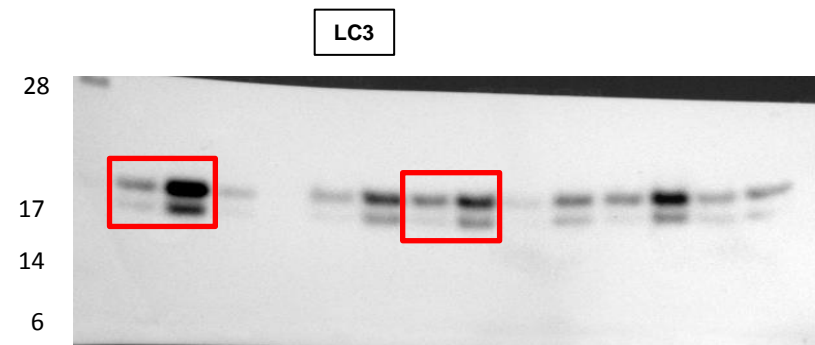

Figure 5D

SOD2

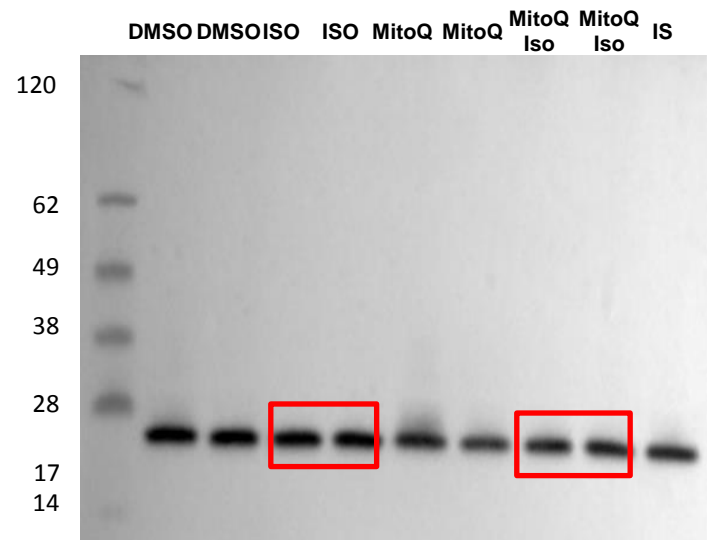

actin

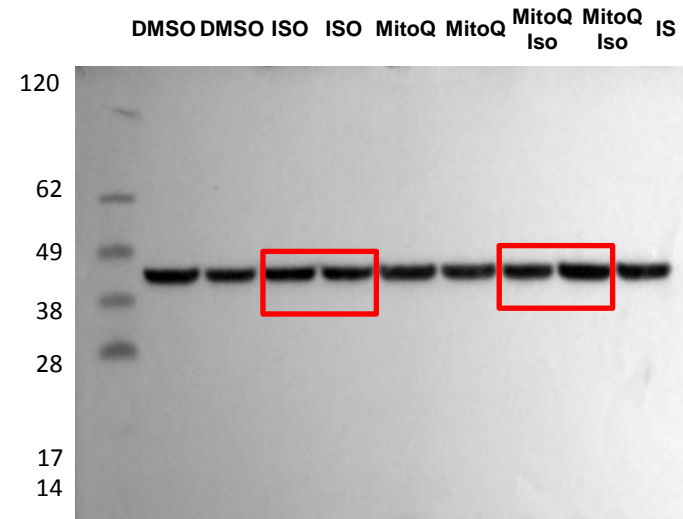

SOD2 acK68

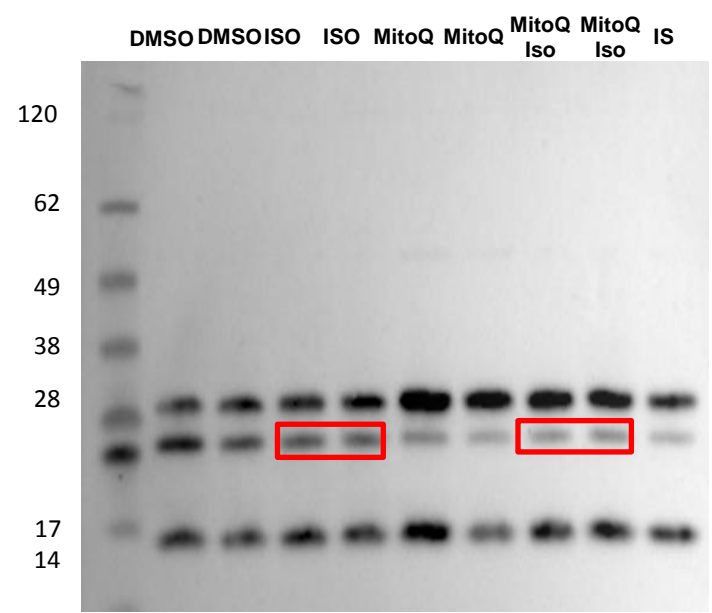

SIRT3

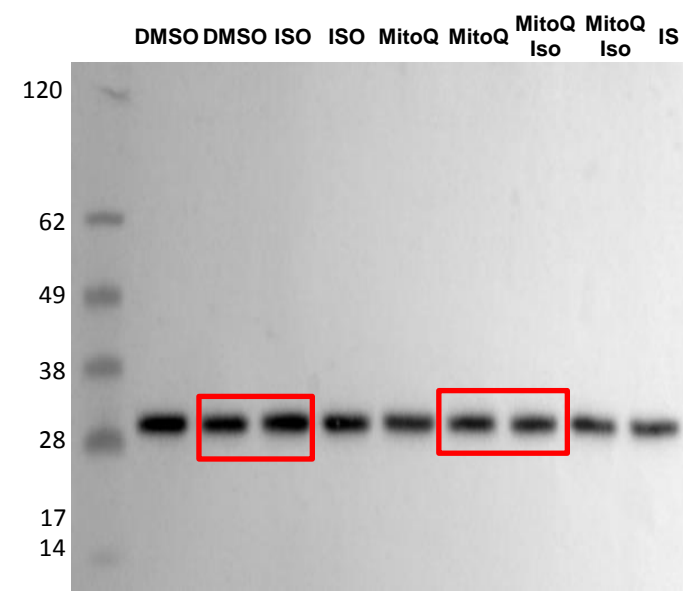

Figure S4C

Catalase

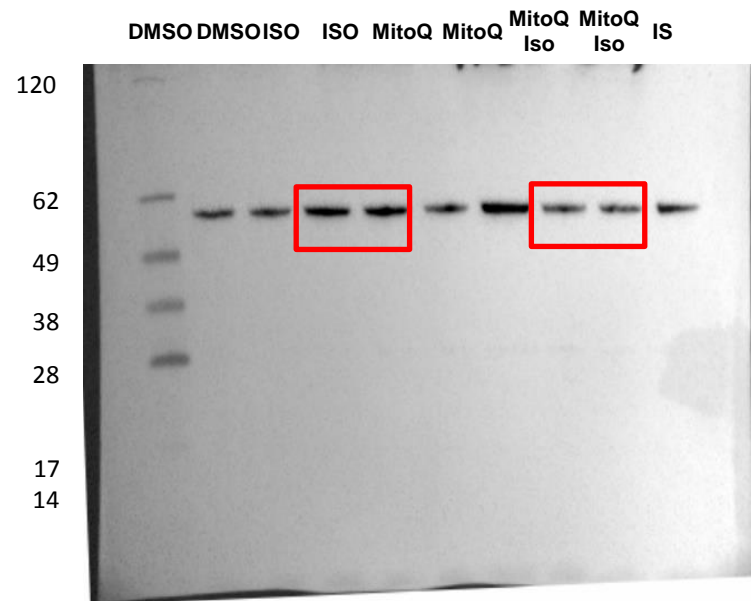

prx1

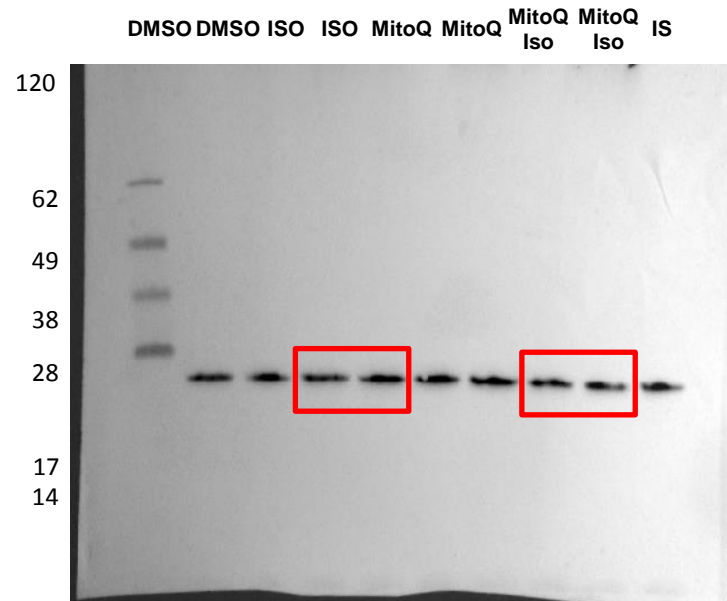

SOD1

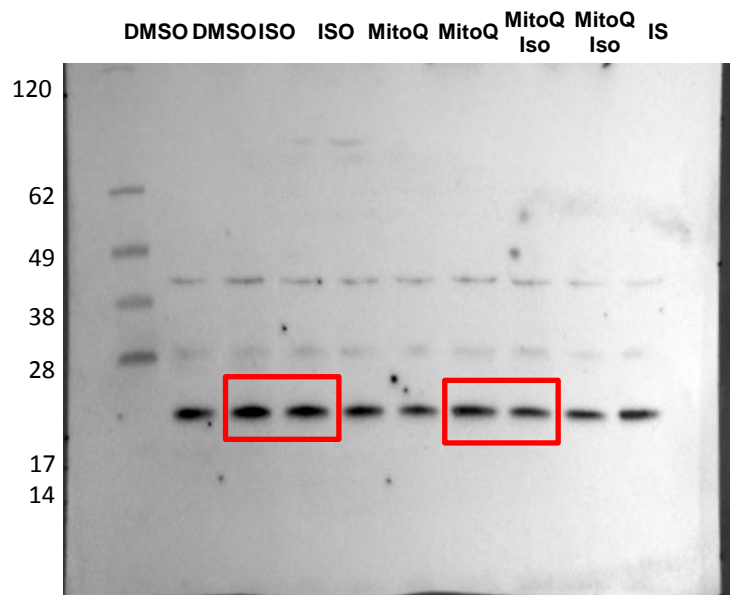

actin

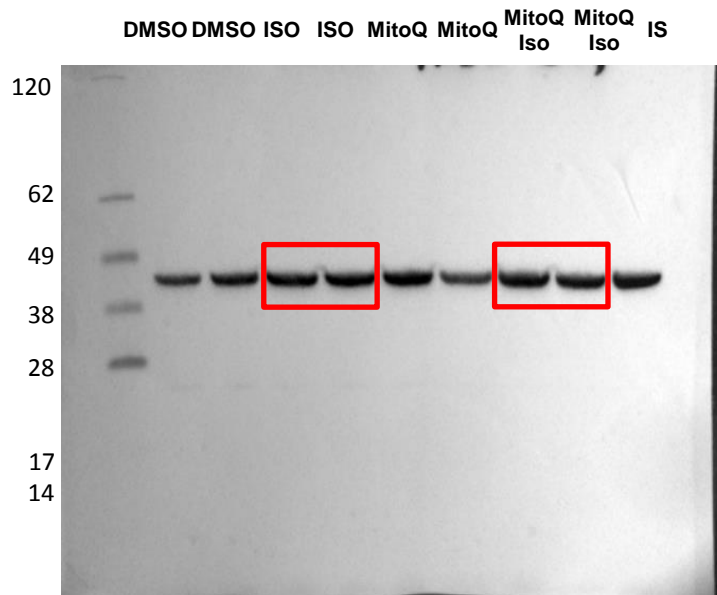



**Figure S4D**

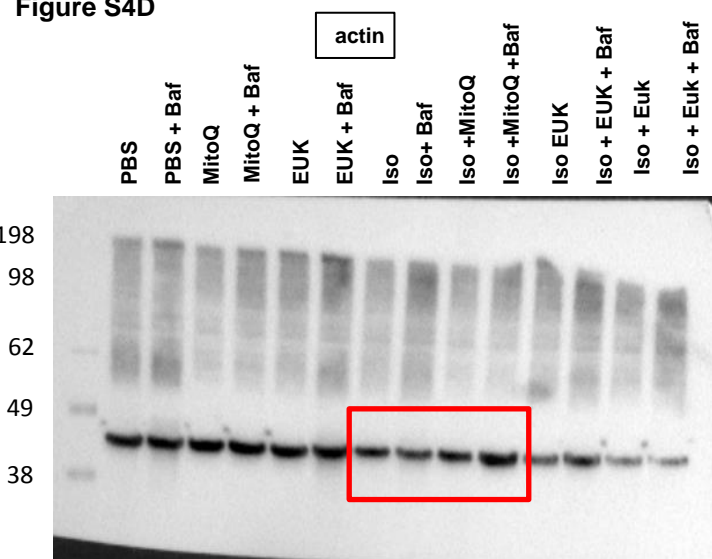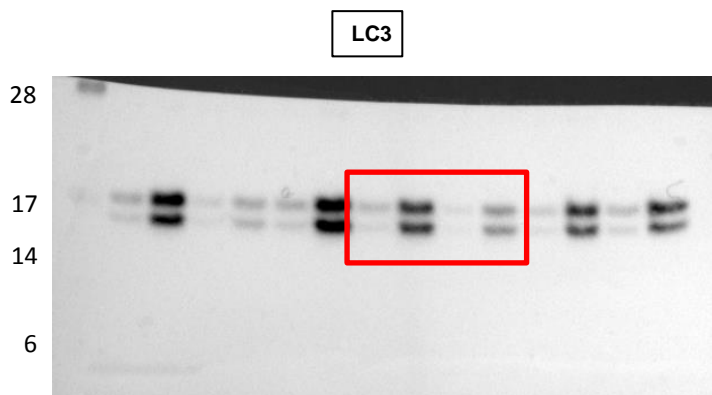

**Figure S4E**

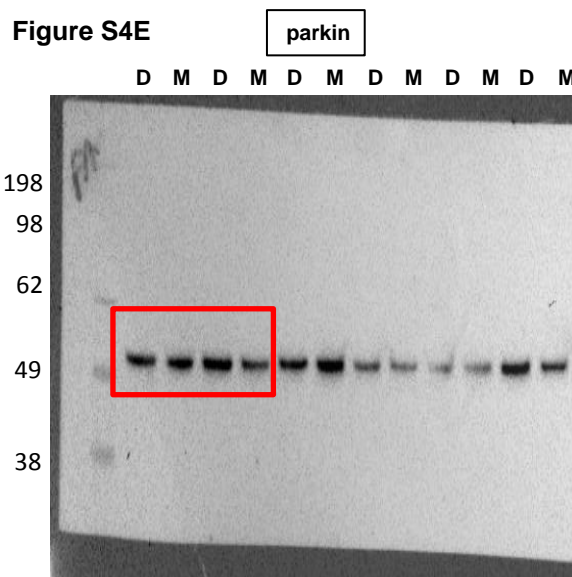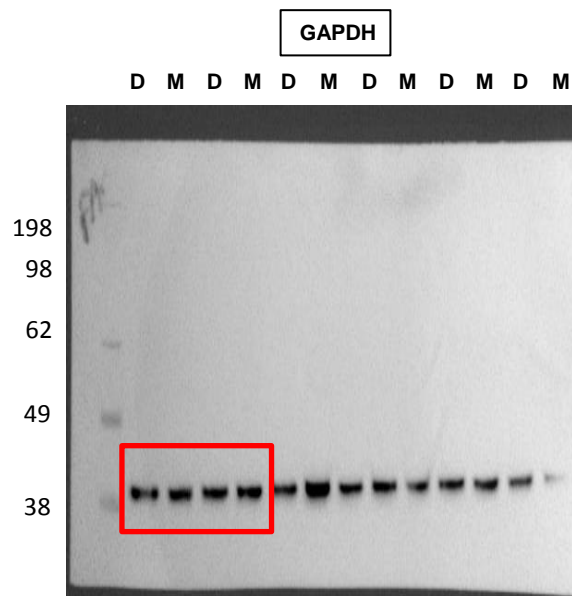

DMSO = D  
MitoQ = M

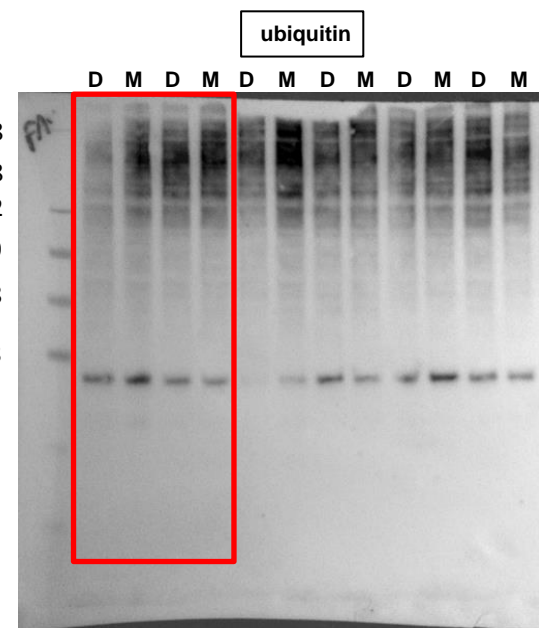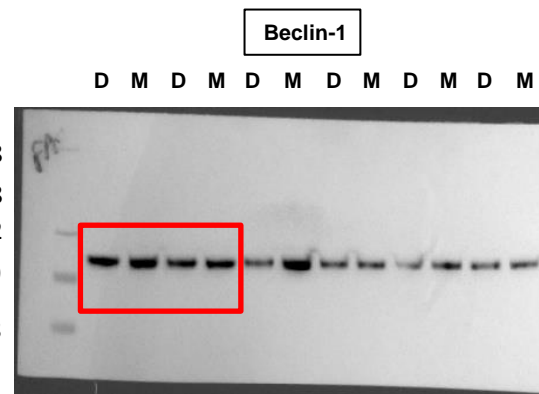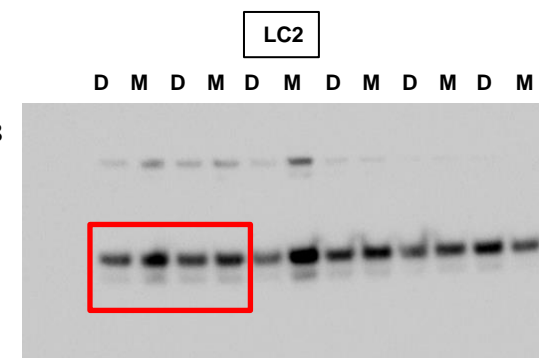



Figure 6C

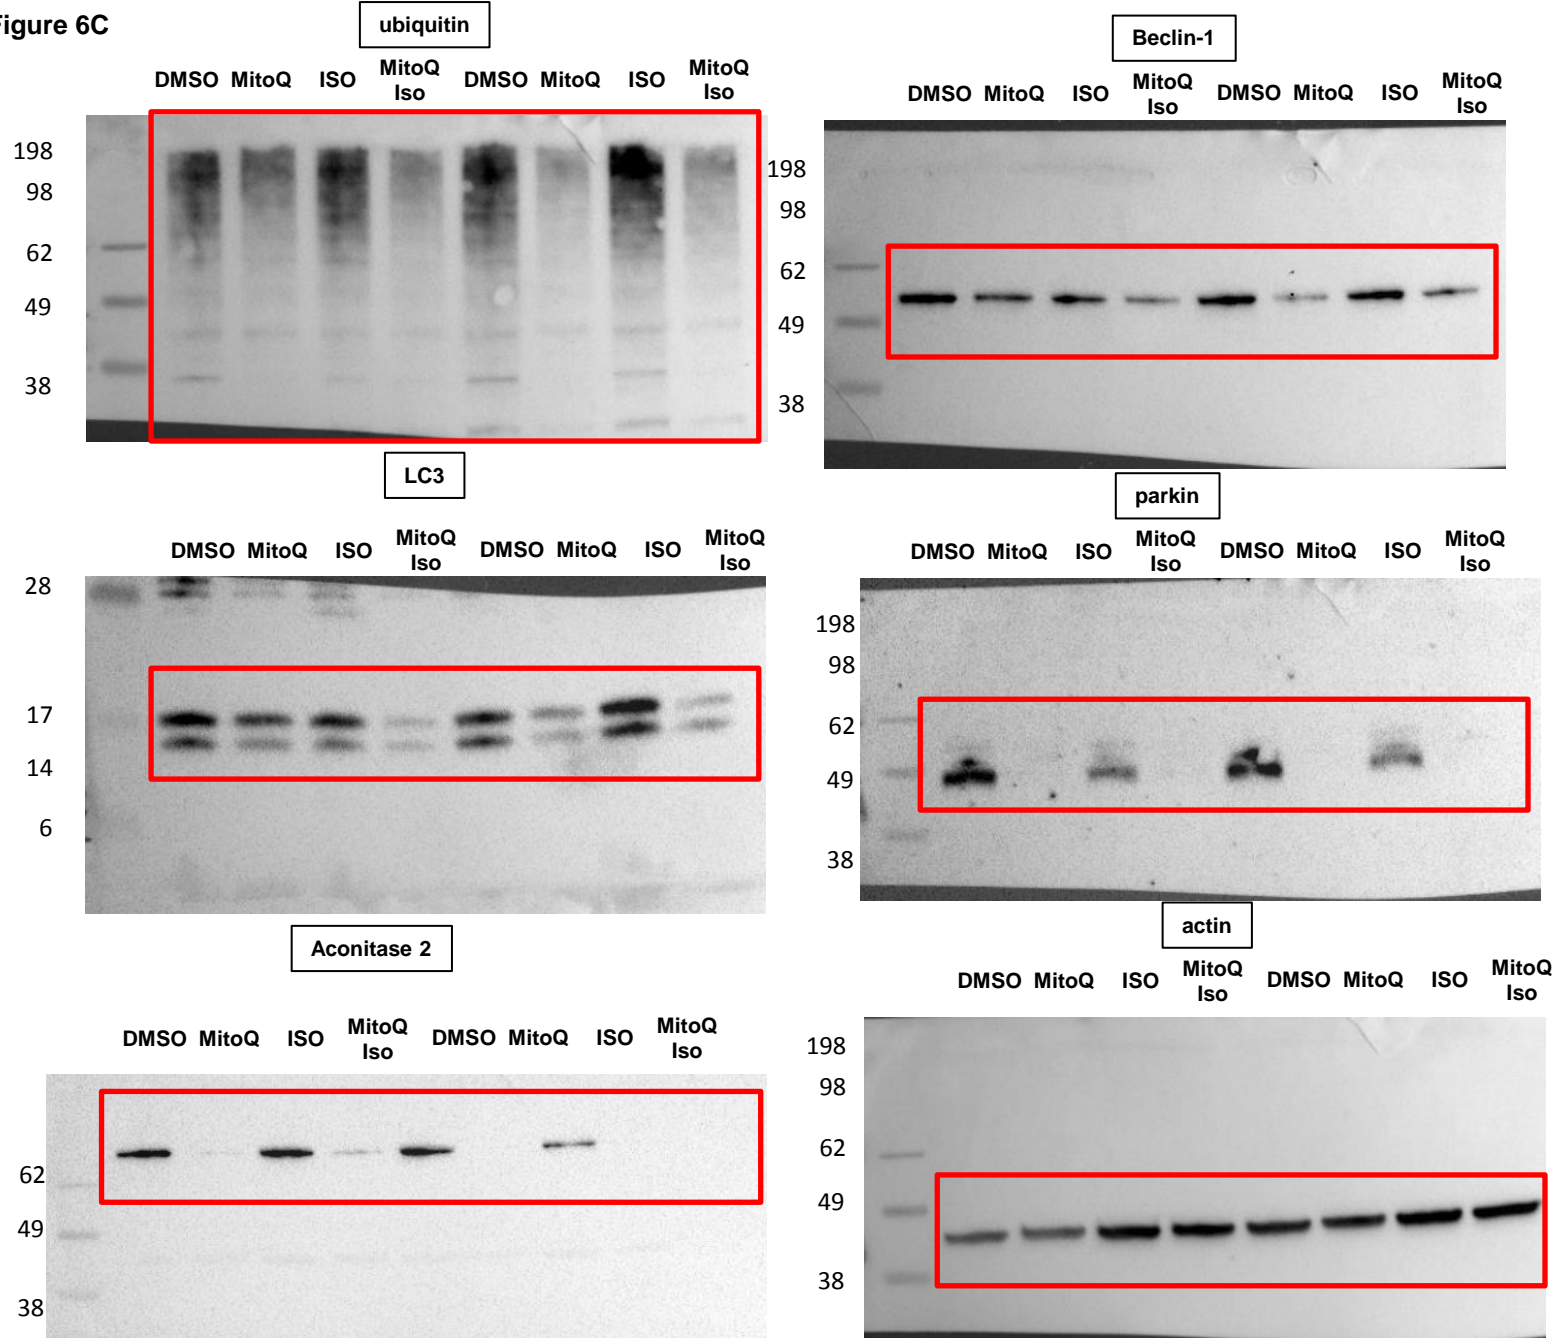

Figure 6E

parkin

D M D M M D M D M E

198  
98  
62  
49  
38

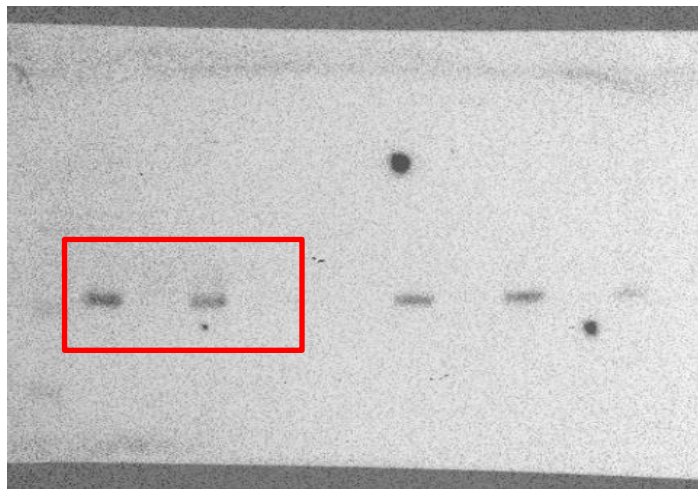

GAPDH

D M D M M D M D M E

198  
98  
62  
49  
38

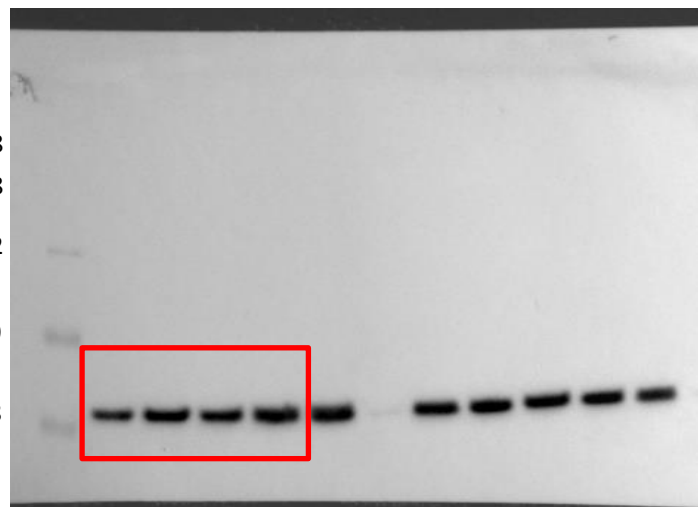

LC3

D M D M M D M D M E

28  
17  
14

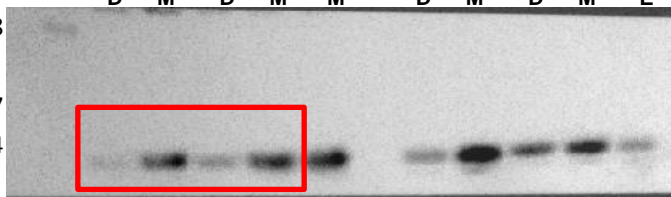

ubiquitin

D M D M M D M D M E

198  
98  
62  
49  
38  
28

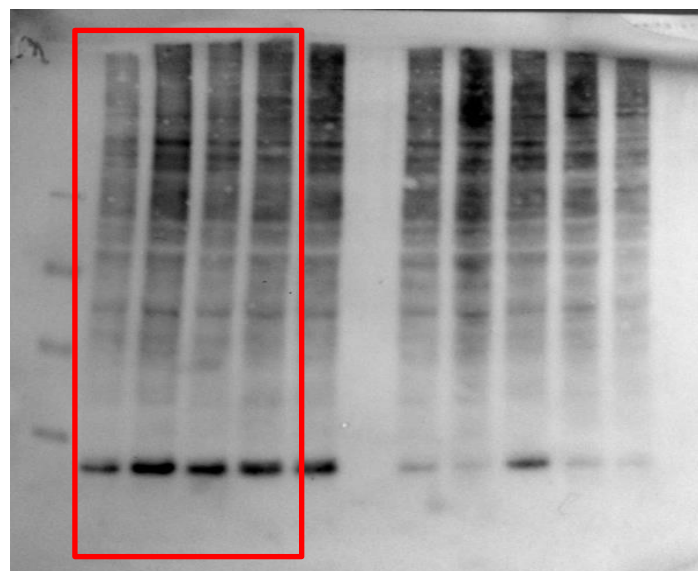

Beclin-1

D M D M M D M D M E

198  
98  
62  
49  
38

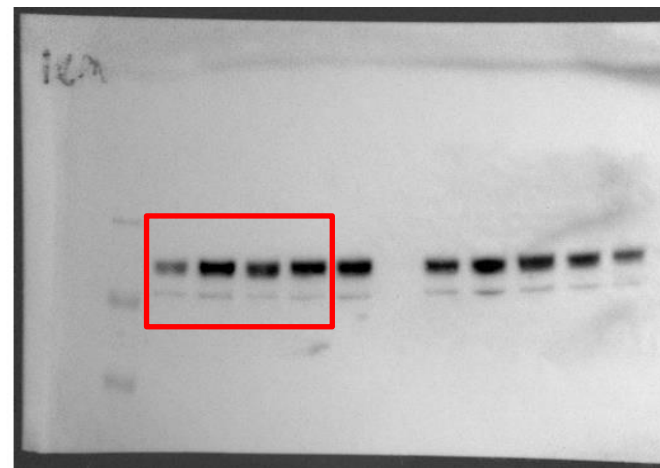

DMSO = D  
MitoQ = M  
EUK 134 = E

**Figure 7E**

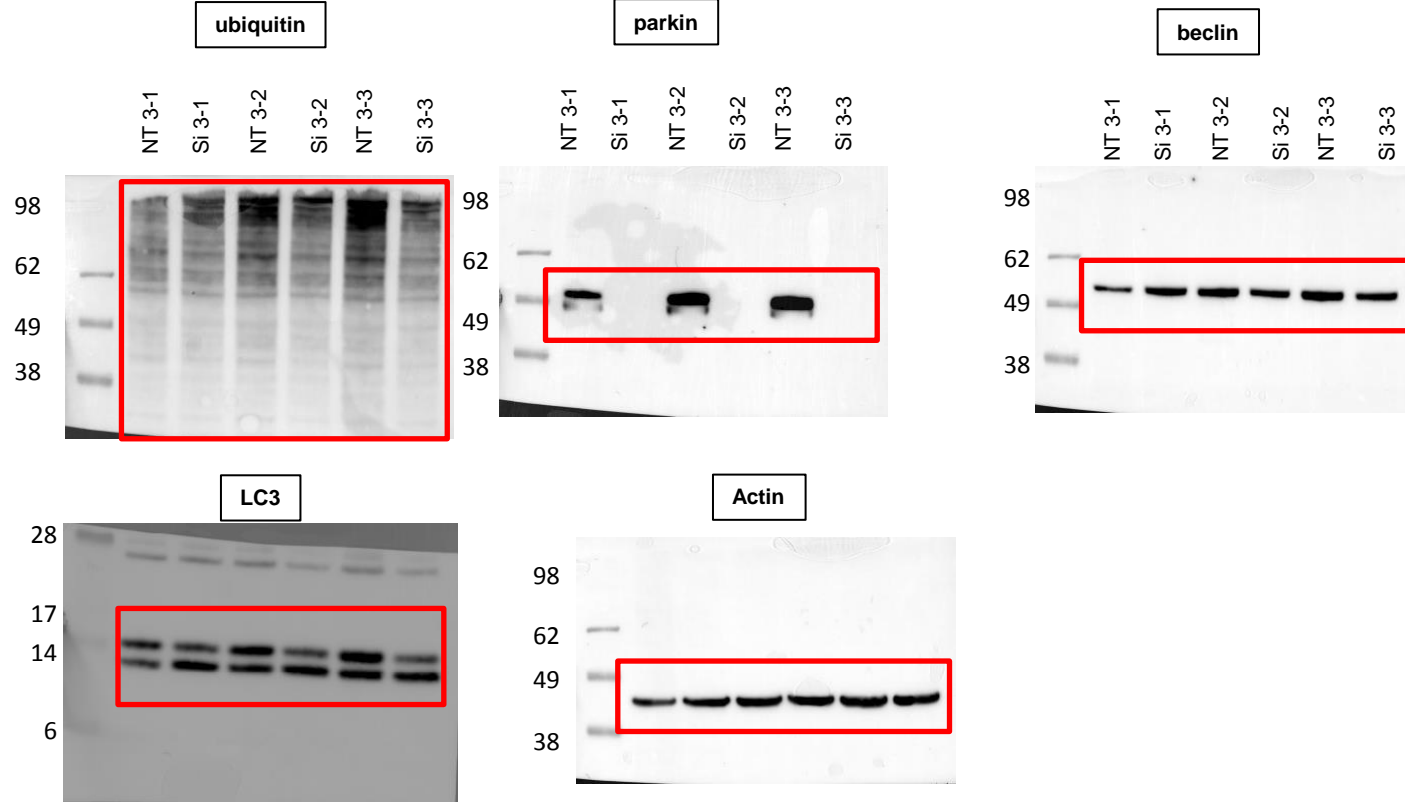

Supplement: s1 [file s1]
