# Supplementary material for: Mitochondrial-Targeted Therapies Require Mitophagy to Prevent Oxidative Stress Induced by SOD2 Inactivation in Hypertrophied Cardiomyocytes
Source: MDPI journal article supplement (doi:10.3390/antiox11040723), 2022-04-06
Supplement: s1 [file s1]

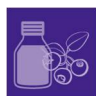**Table S1:** Echocardiographic, hemodynamic and morphometric parameters in sham and HF-rats.

| Parameters                                                     | Sham<br>(n=19) | 2 months-HF<br>(n=20) | P value |
|----------------------------------------------------------------|----------------|-----------------------|---------|
| LVeDD, mm                                                      | 6.6 ± 0.1      | 10.2 ± 0.3            | <0.0001 |
| LVeSD, mm                                                      | 3.5 ± 0.2      | 8.6 ± 0.4             | <0.0001 |
| LVeDP, mmHg                                                    | 2.02 ± 0.3     | 4.93 ± 1.5            | 0.056   |
| LVeSP, mmHg                                                    | 129 ± 5        | 122 ± 4               | 0.283   |
| dP/dt <sub>max</sub> , 10 <sup>-3</sup> mmHg.sec <sup>-1</sup> | 9.9 ± 0.4      | 7.9 ± 0.4             | 0.002   |
| dP/dt <sub>min</sub> , 10 <sup>-3</sup> mmHg.sec <sup>-1</sup> | 9.5 ± 0.6      | 6.6 ± 0.5             | 0.002   |
| FS, %                                                          | 48 ± 2         | 17 ± 2                | <0.0001 |
| SV, mL/beat <sup>-1</sup>                                      | 0.37 ± 0.02    | 0.31 ± 0.02           | 0.016   |
| CO, mL/min <sup>-1</sup>                                       | 155 ± 8        | 126 ± 7               | 0.011   |
| DPB, mmHg                                                      | 105 ± 5        | 95 ± 6                | 0.171   |
| BW, g                                                          | 459 ± 7        | 462 ± 9               | 0.851   |
| HW, g                                                          | 1.25 ± 0.04    | 1.61 ± 0.08           | 0.0005  |
| HW/BW, mg/g                                                    | 2.74 ± 0.09    | 3.51 ± 0.19           | 0.0008  |
| RVW, mg                                                        | 211 ± 9        | 279 ± 23              | 0.009   |
| LVW, g                                                         | 0.95 ± 0.02    | 1.17 ± 0.05           | 0.0007  |
| AW, mg                                                         | 96.9 ± 8.4     | 160.8 ± 18.9          | 0.005   |
| LW, g                                                          | 1.08 ± 0.02    | 1.26 ± 0.12           | 0.158   |

AW, atrial weight; BW, body weight; CO, cardiac output; DPB; diastolic blood pressure; dP/dt<sub>max</sub>, cardiac contractility; dP/dt<sub>min</sub>, cardiac relaxation; FS, fractional shortening; HW, heart weight; LVeDD, left ventricle end diastolic diameter; LVeDP, left ventricle end diastolic pressure; LVeSD; left ventricle end systolic diameter; LVeSP, left ventricle end systolic pressure; LVW, left ventricle weight; LW, lung weight, RVW, right ventricle weight; SV, stroke volume.

**Table S2:** Expression of anti-oxidant and sirtuin enzymes in hypertrophied neonatal rat cardiomyocytes (NCMs).

| Enzymes           | PBS              | Iso              | <i>P</i> value |
|-------------------|------------------|------------------|----------------|
| Catalase          | 0.94 (0.66-1.43) | 0.65 (0.37-0.80) | 0.073          |
| Prx1              | 0.88 (0.62-1.44) | 1.10 (0.64-2.81) | 0.548          |
| SOD1              | 1.11 (0.63-1.26) | 0.92 (0.65-0.94) | 0.700          |
| SOD2              | 1.00 (0.57-1.43) | 1.36 (0.74-1.48) | 0.574          |
| SOD2acK122 / SOD2 | 0.84 (0.62-1.46) | 1.11 (0.57-1.25) | >0.999         |
| SIRT1             | 0.84 (0.56-1.52) | 0.81 (0.49-1.61) | >0.999         |
| SIRT3             | 0.95 (0.68-1.35) | 1.04 (0.51-1.48) | >0.999         |
| SIRT6             | 0.75 (0.71-1.26) | 0.85 (0.69-1.12) | 0.961          |

Quantification of western blot. Data are expressed as median with interquartile ranges.  
Prx1, peroxiredoxin-1; SOD1, superoxide dismutase 1; SOD2, superoxide dismutase 2;  
SOD2acK122 / SOD2, SOD2 acetylated on lysine 122

**Table S3:** Correlation between SOD2 and sirtuins in the mitochondria by PLA.

| Interaction                              | PBS               | Iso                | <i>P</i> value |
|------------------------------------------|-------------------|--------------------|----------------|
| SOD2 : SIRT3 (mean intensity)            | 18637 (804-88114) | 10622 (1131-18289) | <0.0001        |
| SOD2 : SIRT3 (number of spots)           | 145 (102-211)     | 105 (70-160)       | 0.0002         |
| SOD2 : SIRT3 / mitotracker (correlation) | 0.58 (0.55-0.66)  | 0.46 (0.42-0.48)   | 0.0026         |

Quantification of proximity ligation assay between SIRT3 and SOD2 (PLA SOD2 : SIRT3) staining in mitochondria. Mean fluorescence intensity and number of spots by cells was quantified by a “home-made” plugin on ImageJ soft-ware. Localization was quantified by pearson’s coefficient, describing the correlation between PLA intensities and mitotracker images. Data are expressed as median with interquartile ranges.

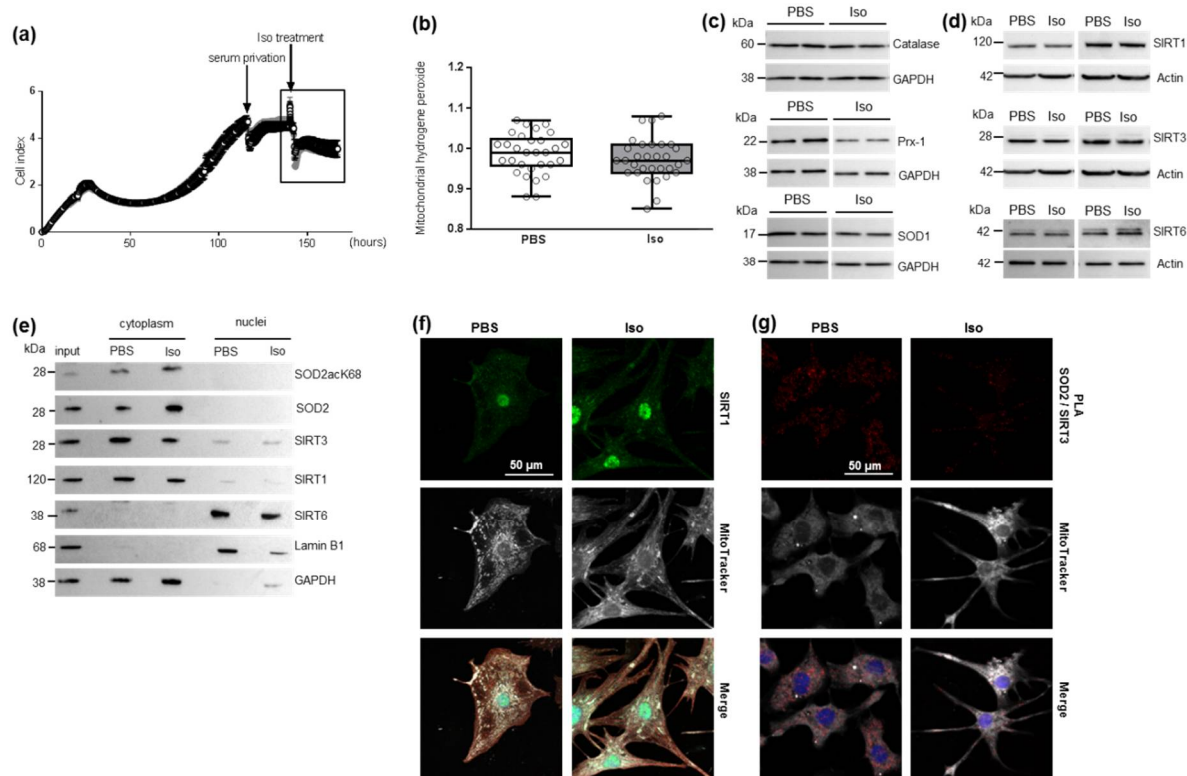

**Figure S1:** Characterization of mitochondrial oxidative stress in hypertrophied neonatal rat cardiomyocytes (NCMs). (a) Cell index quantification in untreated- (black line) and Isoproterenol (Iso) treated- (grey line) NCMs by RTCA analysis. Cell index was recorded every 15 minutes and the square represents the curve from Iso-treatment zoomed in figure 1a (n=4 independent isolation, in duplicate). Oxidative stress was also quantified in untreated (PBS) or Iso-treated NCMs for 24h by (b) mitochondrial hydrogen peroxide quantification and by (c) western blot of catalase, peroxiredoxin-1 (Prx1) and superoxide dismutase 1 (SOD1). (c) Western blot of SIRT1, SIRT3 and SIRT6. (d) Representative images of SOD2acK68 and SOD2 localized in cytoplasm after sub-cellular fractionation in untreated (PBS) and Iso-treated NCMs. (e) Representative images of SIRT1 (green) localized in mitochondria (white) of untreated (PBS) and Iso-treated NCMs. (f) Representative images of proximity ligation assay between SIRT3 and SOD2 (red) localized in mitochondria (white) in untreated (PBS) or Iso-treated NCMs for 24h. Colocalization appeared in merge images. Nuclei were stained by Dapi (blue). Data are expressed as medians with interquartile ranges for at least 3 independent experiments. Images were selected to represent the mean values of each condition.

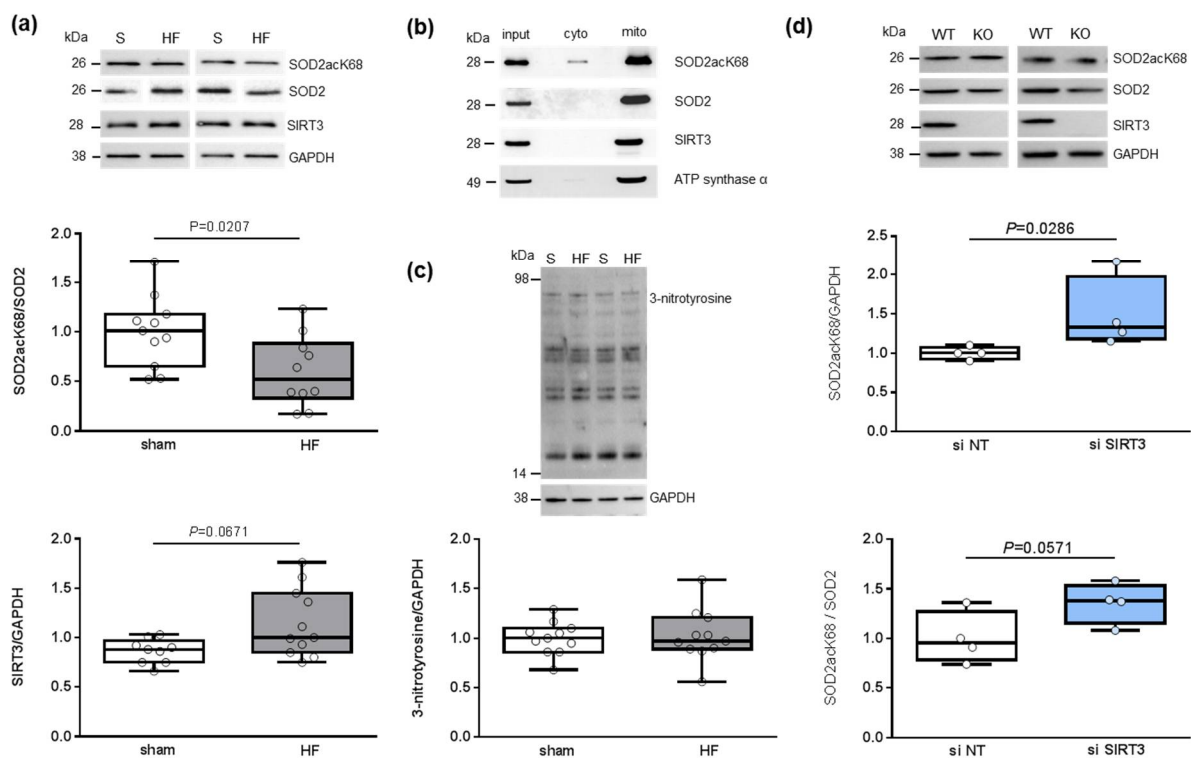

**Figure S2.** SIRT3 regulates SOD2 expression and its deacetylation in ischemic heart. Western blot quantification of (a) SOD2acK68, SOD2 and SIRT3 in LV of control- (sham) or HF-rats (HF) 2-months after MI (9 to 11 rats). (b) Representative images of SOD2acK68, SOD2 and SIRT3 localized in mitochondria (validated by ATP synthase  $\alpha$ ) after sub-cellular fractionation (n=4). (c) Western blot quantification of 3-nitrotyrosine in LV of the same animals. (d) Validation of SIRT3 inhibition and quantification of SOD2acK68 and SOD2 in isolated adult cardiomyocytes from control (WT) (n=4) and SIRT3 KO mice (n=4). Data were normalized on GAPDH. Only significant P values were indicated from at least 3 independent experiments. Images were selected to represent the mean value of each condition.

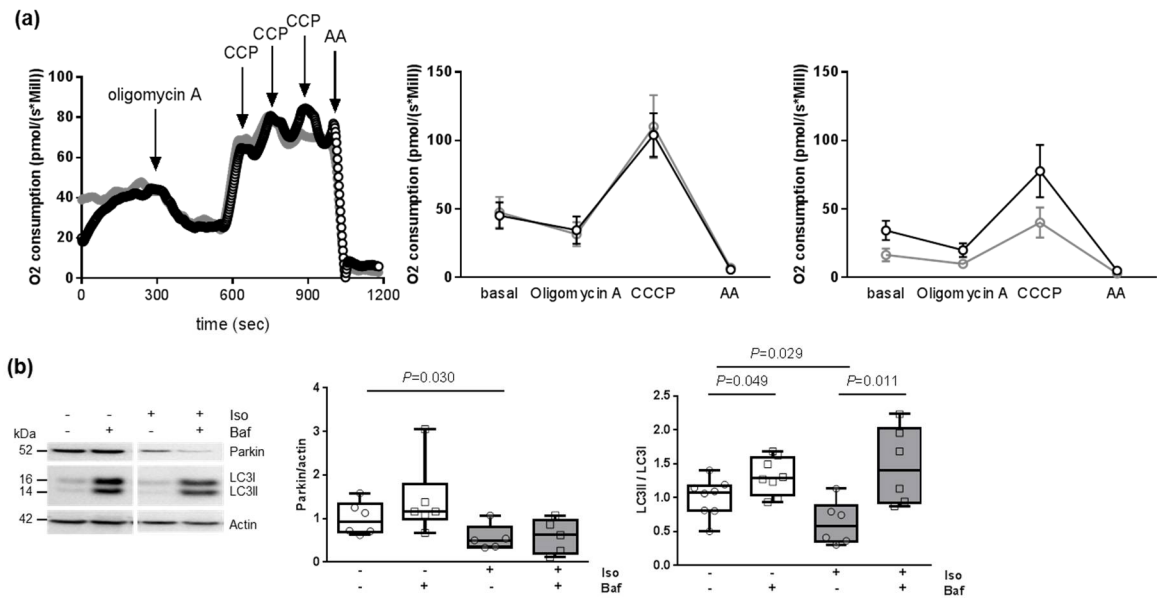

**Figure S3:** Characterization of mitochondrial respiration and autophagy in hypertrophied neonatal rat cardiomyocytes (NCMs). **(a)** Representative oxygen consumption at basal level and after oligomycin, carbonyl cyanide m-chlorophenyl hydrazine (CCCP) and antimycin A (AA) addition (left panel) and its quantification to characterize mitochondrial respiration (n=9) after 24h (middle panel) and 48h (right panel) in untreated- (black line) and Iso-treated (grey line) NCMs. **(b)** Mitophagy was quantified in NCMs control (-) or treated with Iso (+) with (+) or without (-) bafilomycin A1 (Baf) for 24h by western blot of parkin and LC3II/LC3I ratio. Data were normalized to actin. Only significant P values are indicated from at least 3 independent experiments. Images were selected to represent the mean values of each condition.

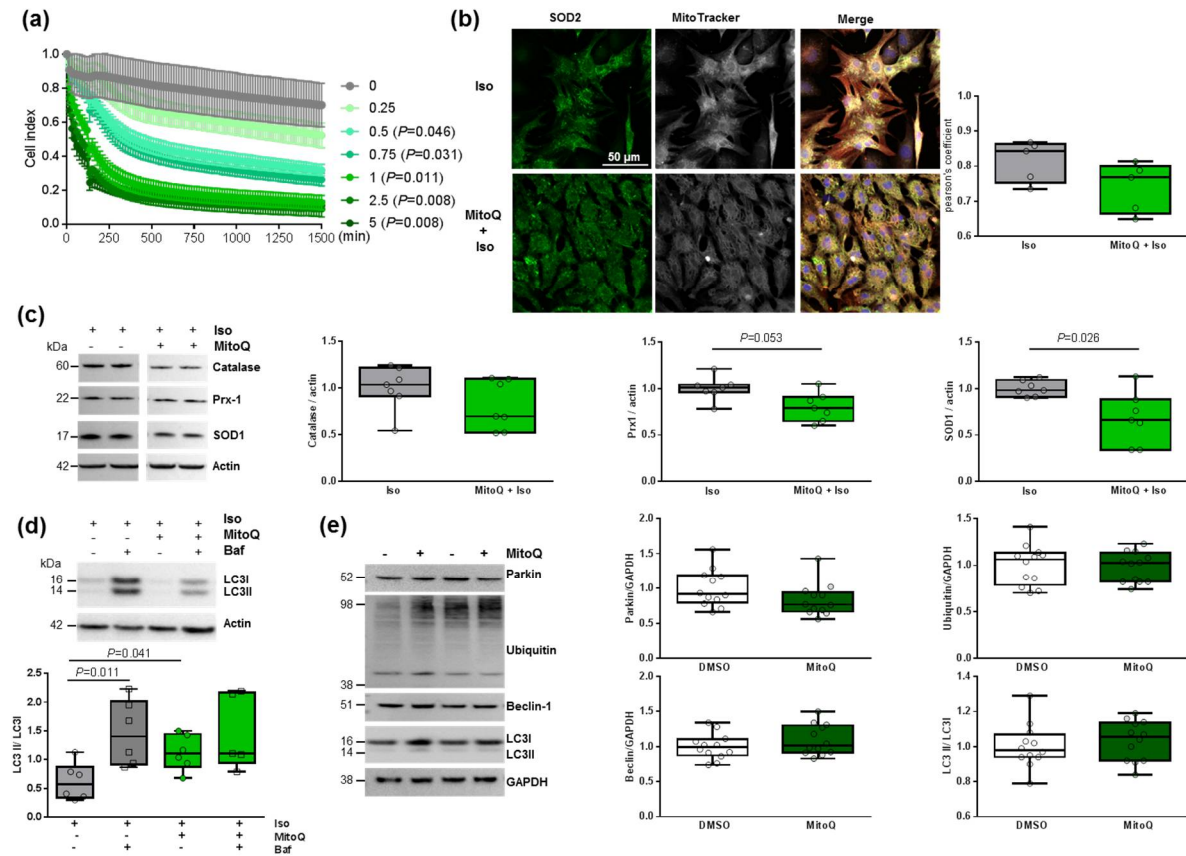

**Figure S4:** Effect of MitoQ in hypertrophied neonatal rat cardiomyocytes and fibroblast (NCFs). **(a)** Cell index quantification in hypertrophied NCM with pre-treatment with mitoquinone (MitoQ, from 0.25 to 5  $\mu\text{mol/L}$ ) (green line) or DMSO (as control) (grey line) by RTCA analysis. Cell index was recorded every 15 minutes ( $n=3$  independent isolation). **(b)** Representative images of SOD2 (green) localized in mitochondria (white) of Iso-treated NCMs for 24h with or without MitoQ pre-treatment. Colocalization appeared in merge images. Localization of SOD2 in mitochondria was quantified by pearson's coefficient, describing the correlation between the intensities of SOD2 and mitotracker images. **(c)** Oxidative stress was quantified in Iso treated NCMs with (+) or without (-) MitoQ by western blot of catalase, peroxiredoxin-1 (Prx1) and superoxide dismutase 1 (SOD1). **(d)** Autophagy was quantified in NCMs treated by Iso with (+) or without (-) MitoQ pre-treatment and with (+) or without (-) Bafilomycin A1 (Baf) co-treatment by western blot of LC3II/I ratio. Data from western blot of NCMs were normalized to actin. **(e)** Mitophagy was quantified in NCFs treated with (+) or without (-) MitoQ pre-treatment by western blot of parkin, ubiquitinated proteins, beclin-1 and LC3II/I ratio. Data were normalized to GAPDH. Only significant P values are indicated from at least 3 independent experiments. Images were selected to represent the mean values of each condition.
